# Supplementary material for: Collagen fiber regulation in human pediatric aortic valve development and disease
Source: PubMed Central journal article supplement (PMC8105334; doi:10.1038/s41598-021-89164-w), 2021-05-07
Supplement: 41598_2021_89164_MOESM1_ESM.pdf [file 41598_2021_89164_MOESM1_ESM.pdf]

# Supplemental Materials

Collagen Fiber Regulation in Human Pediatric Aortic Valve Development and Disease

Cassandra L. Clift, BS<sup>1</sup>, Yan Ru Su, MD, PhD<sup>2</sup>, David Bichell, MD<sup>3</sup>, Heather Jensen Smith<sup>4</sup>, PhD, Jennifer Bethard, MS<sup>1</sup>, Kim Norris-Caneda, MS<sup>1</sup>, Susana Comte-Walters, MS<sup>1</sup>, Lauren E. Ball, PhD<sup>1</sup>, M.A. Hollingsworth, PhD<sup>4</sup>, Anand Mehta, PhD<sup>1</sup>, Richard R. Drake, PhD<sup>1</sup>, Peggi M. Angel, PhD<sup>1\*</sup>

1, Department of Cell and Molecular Pharmacology; MUSC Proteomics Center; Bruker-MUSC Clinical Glycomics Center of Excellence, Medical University of South Carolina, Charleston, SC

2, Division of Pediatric Cardiac Surgery, Vanderbilt University Medical Center, Nashville, Tennessee

3, Division of Cardiovascular Medicine, Department of Medicine, Vanderbilt University Medical Center, Nashville, Tennessee

4, Eppley Institute for Cancer Research & Allied Diseases, University of Nebraska Medical Center, Omaha, NE

\*Corresponding Author: Peggi M. Angel, 173 Ashley Ave, BSB358, Charleston, SC 29425

Email: [angelp@musc.edu](mailto:angelp@musc.edu) Phone: [\(843\) 792-8410](tel:(843)792-8410) Fax: [\(843\) 792-0481](tel:(843)792-0481)

**Short title:** Collagen types in human aortic valve

**Total word count:** 3946/4500 (not including Abstract, Methods, References, and Figure Legends)

**Key words:** aortic valve, congenital aortic valve stenosis, extracellular matrix, collagen, valve development, proteomics, collagen proline hydroxylation, collagen proteomics

Abbreviations: AVS, Aortic Valve Stenosis; pCAVS, pediatric end-stage congenital aortic valve stenosis; AVI, aortic valve insufficiency; ECM, extracellular matrix; PTM, post-translational modification; HYP, hydroxyproline; HRAM- high resolution accurate mass; GAG, glycosaminoglycan.

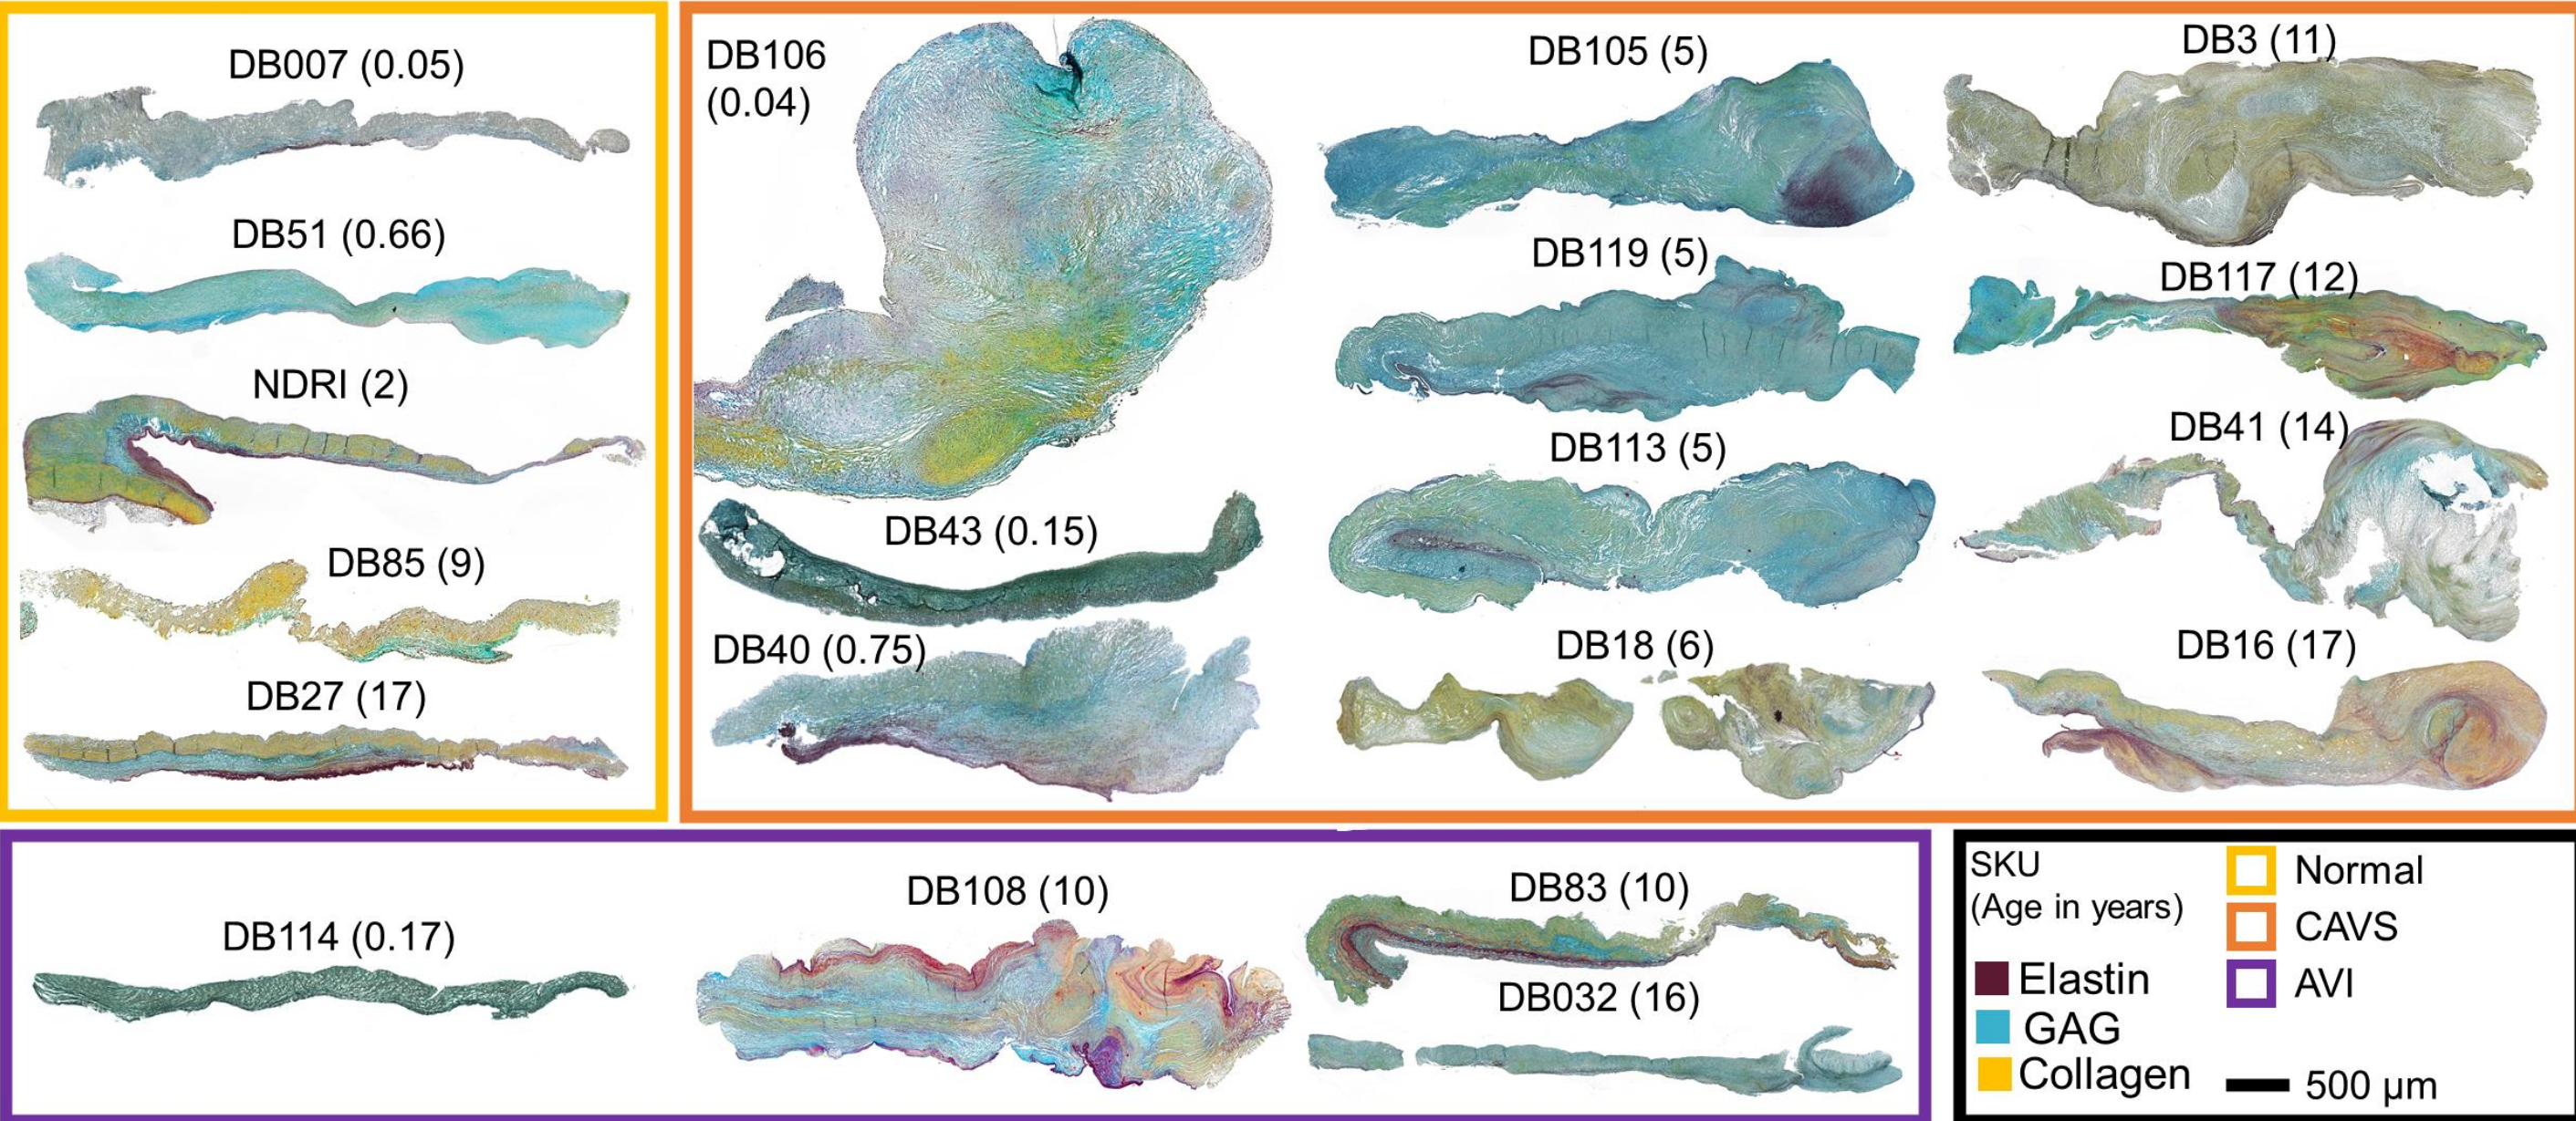

**Supplemental Figure S1:** Movat's Pentachrome images of all valves studied in Figure 1. DB113 and DB32 are included as representative images only, due to delayed acquisition and manufacturer's difference in sample preparation.

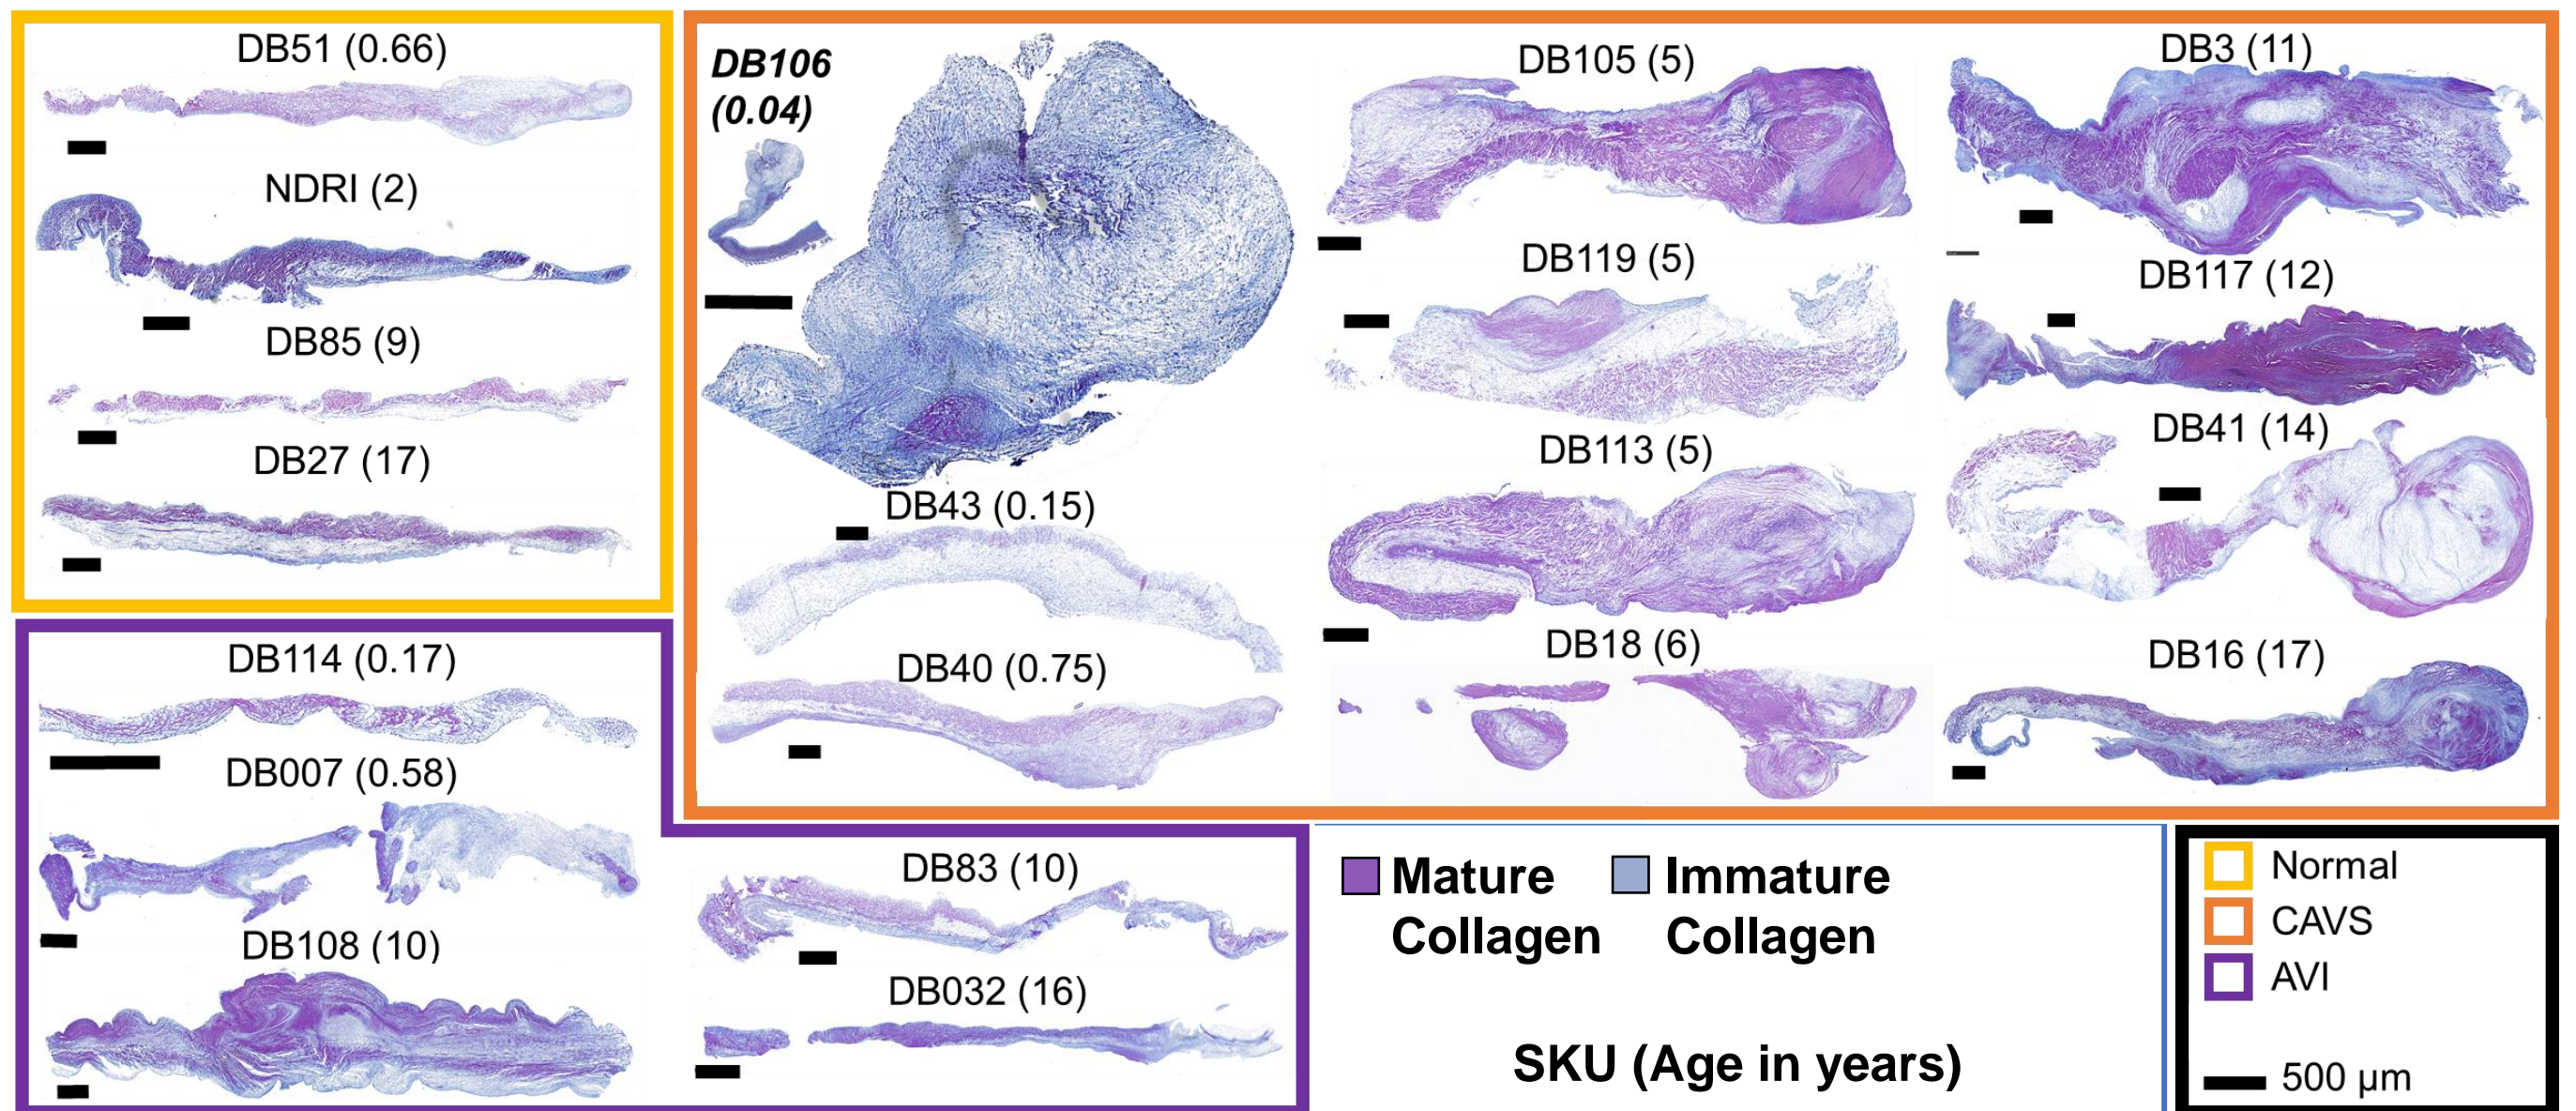

**Supplemental Figure S2:** Herovici images for all valves studied in Figure 2.

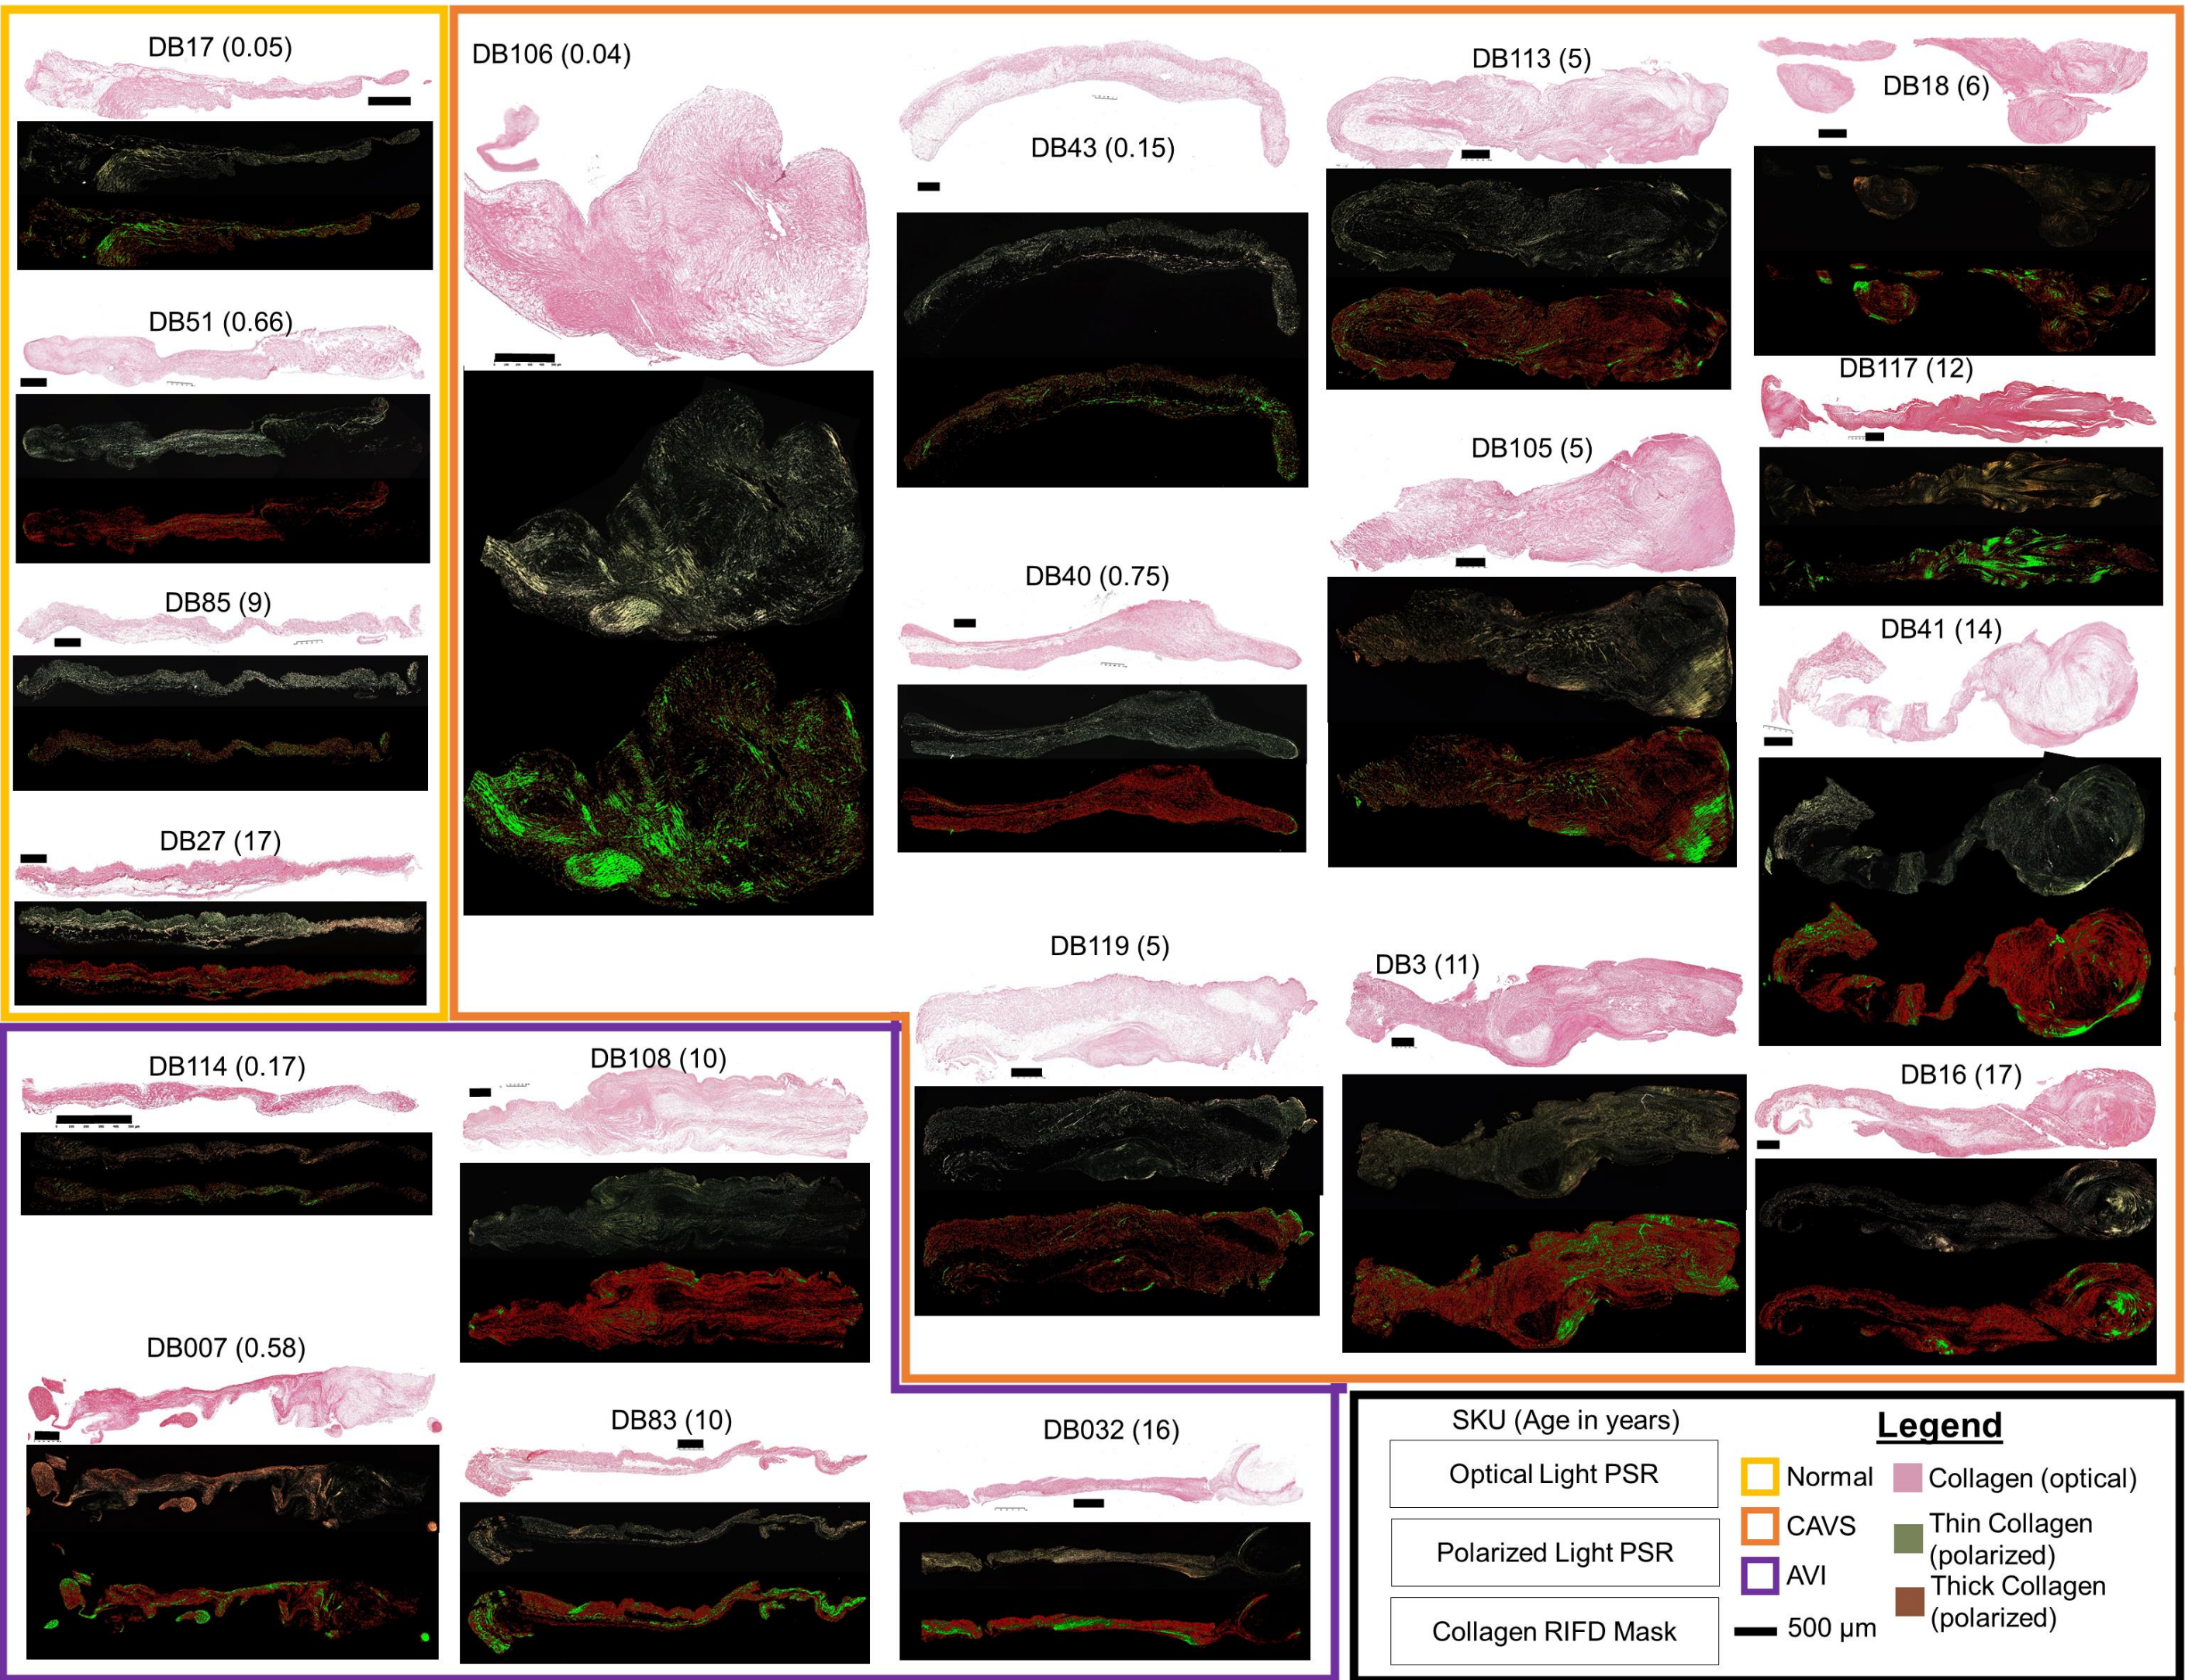

**Supplemental Figure S3:** Optical and Polarized Picosirius Red (PSR) images of valves studied in Figure 3. RIFD (Regions of Increased Fiber Density) masks are shown.

## HRAM Proteomics

### Tissue preparation

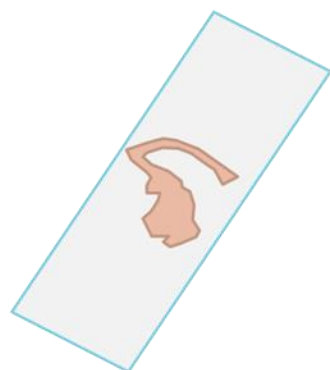

Formalin fixed paraffin embedded tissue (FFPE)

*Heat 1 Hr 60°C*

*Dewax*

Heat Induced Epitope Retrieval (HIER)

*10mM Tris pH 9*

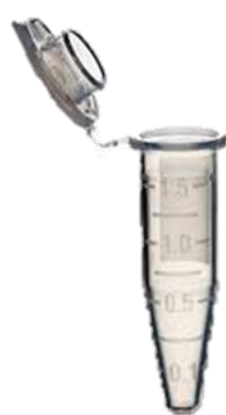

### ECM Digest

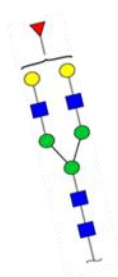

PNGase F Digest and Deglycosylation  
*Detaches & removes N-glycans*

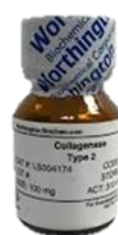

Collagenase III Digest  
*Detaches ECM peptides*

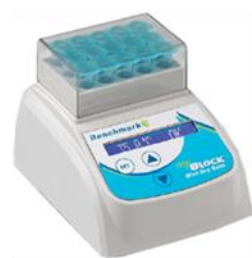

Incubate overnight  
*37°C, shaking*

### Acquire ECM

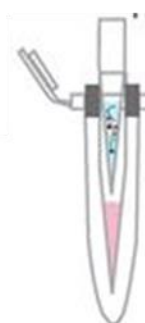

STAGE Tip Cleanup  
*Solid phase extraction of ECM peptides*

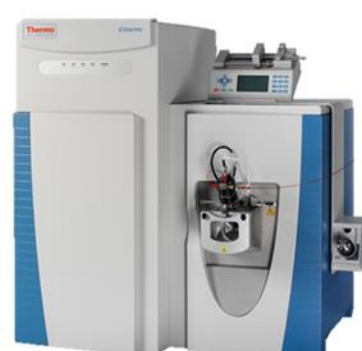

Acquire Mass Spectra  
(LC-MS/MS)

**Supplemental Figure S4:** Collagenase Type III high resolution accurate mass (HRAM) Proteomics workflow on formalin-fixed paraffin embedded tissue sections.

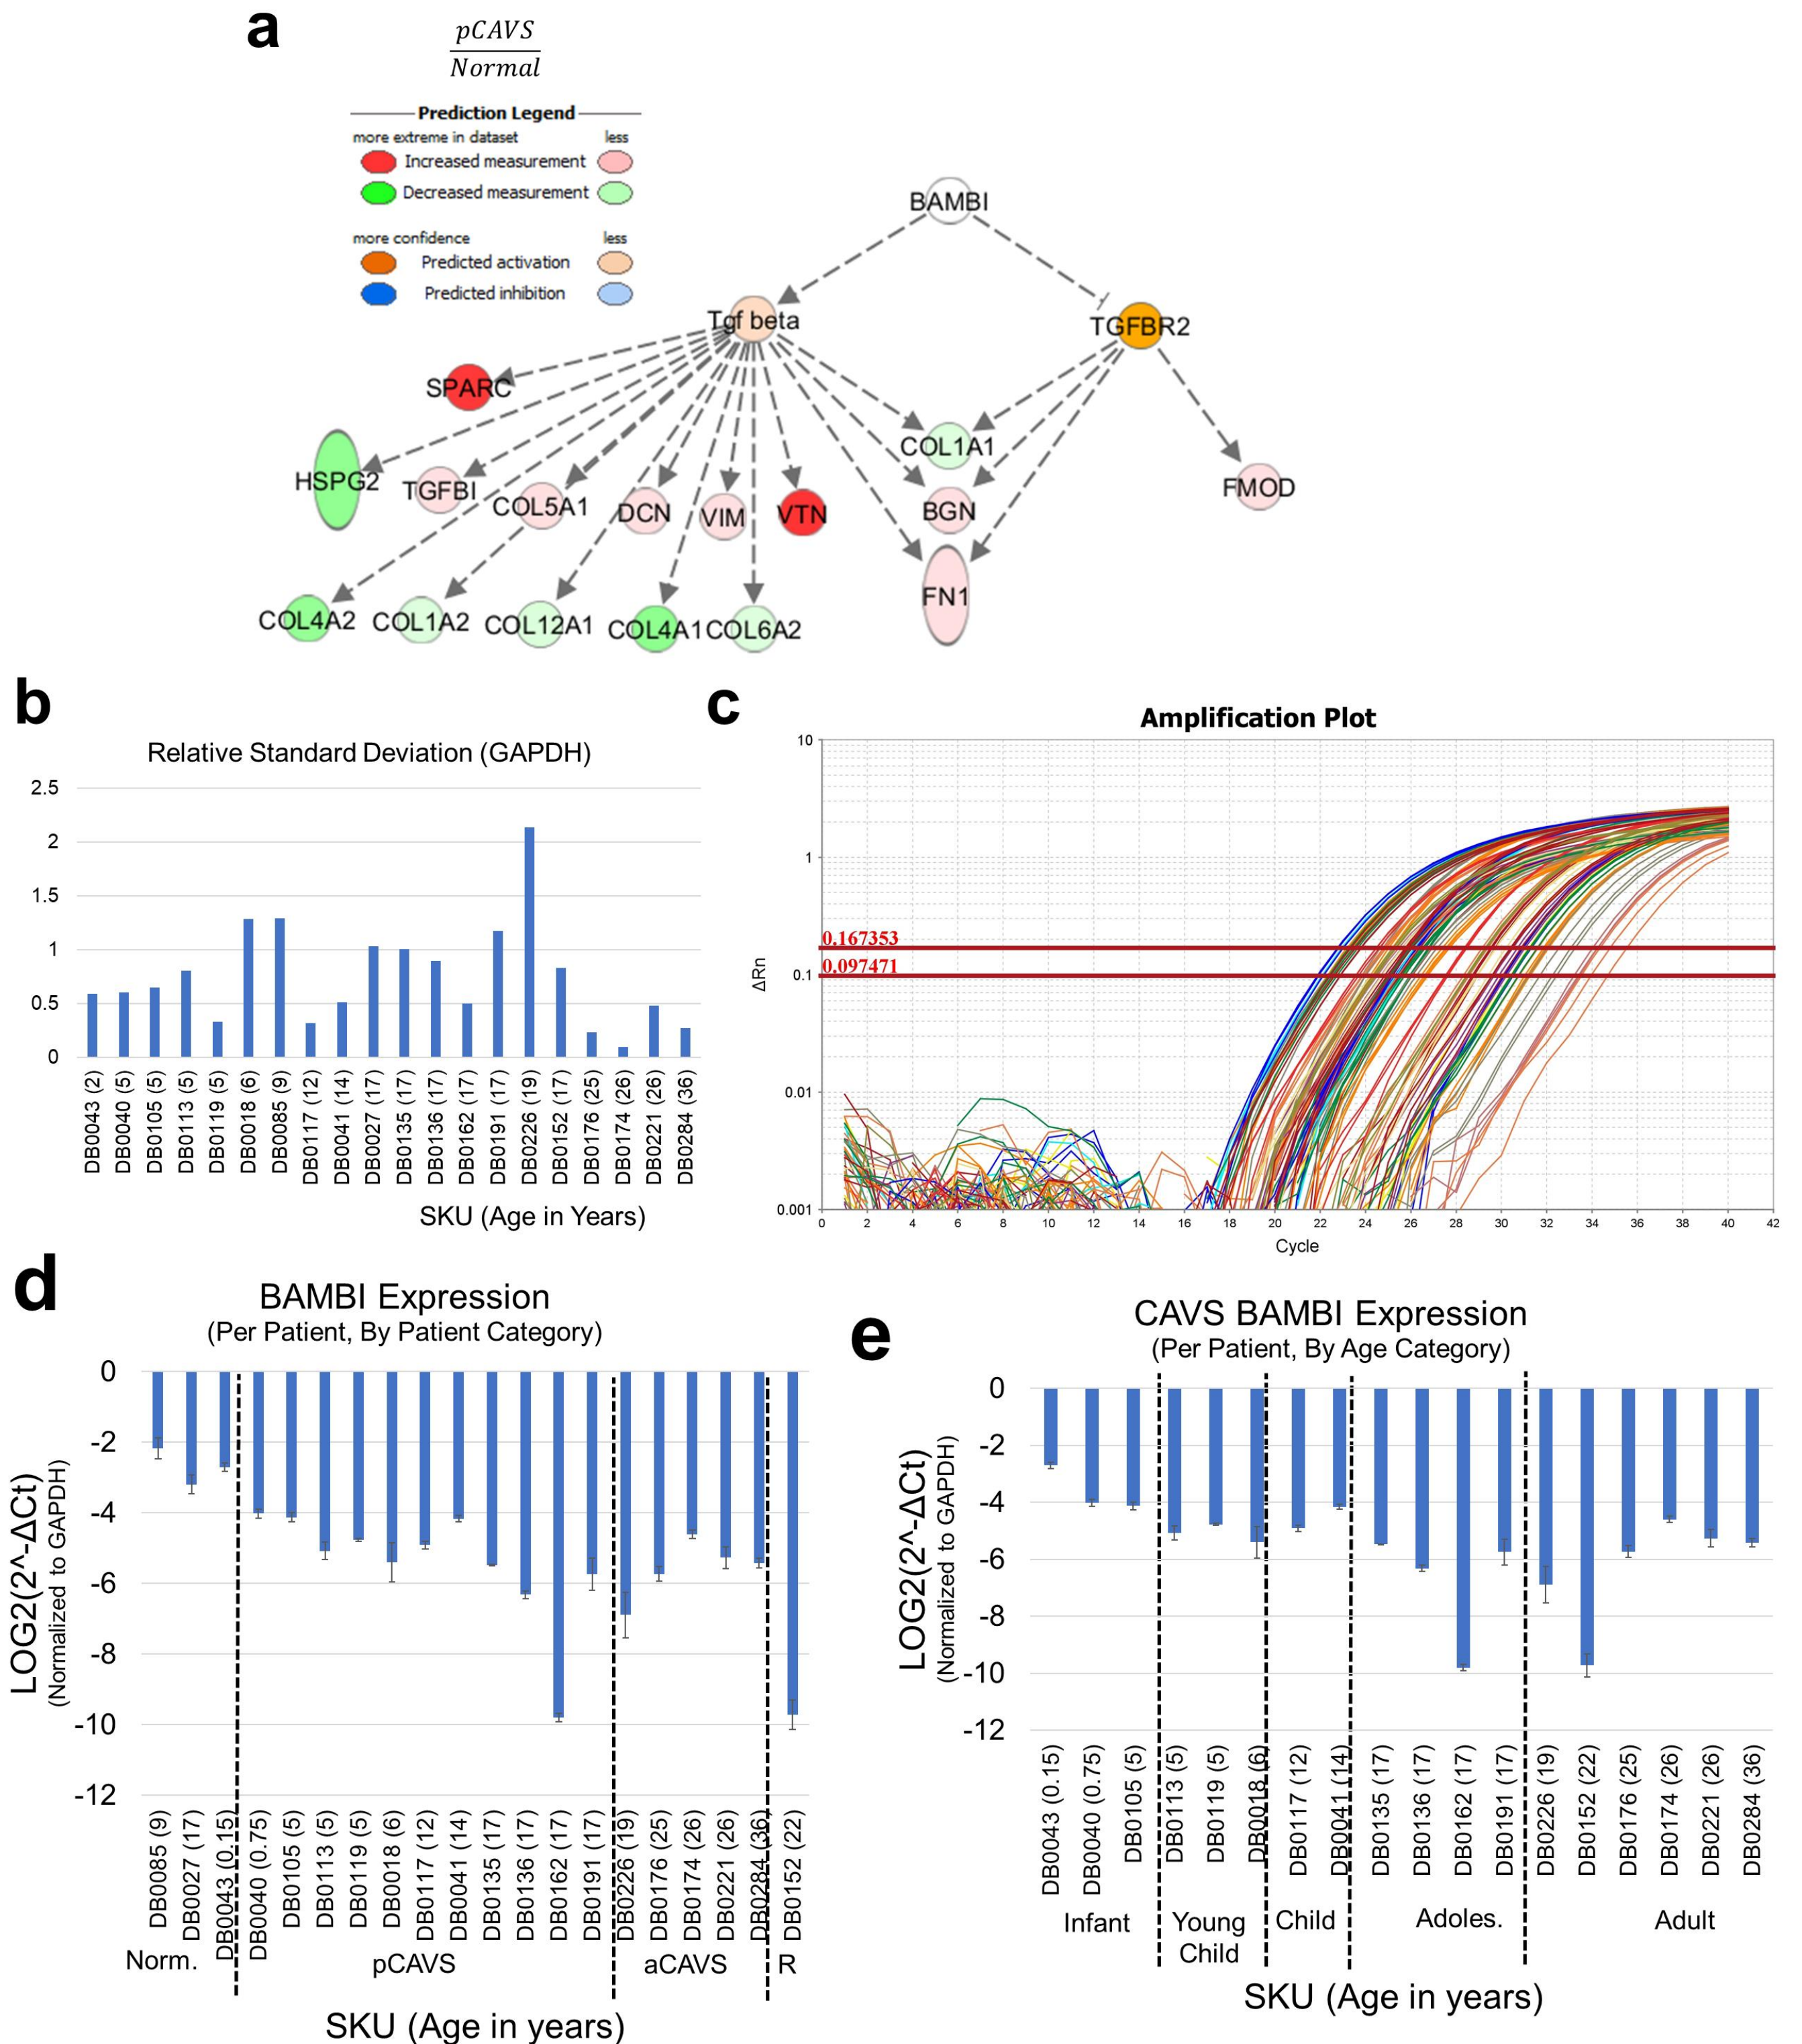

**Supplemental Figure S5: Causal network analysis implicating BAMBI and expression analysis. A)** Causal Network Analysis identifies a potential Master Regulator sorted by highest p-value overall and of overlap: BAMBI (BMP and activin membrane-bound inhibitor homolog, p-value 1.16E-18), based on trending expression patterns. **B)** Amplification plot of qRTPCR experiments in **Figure 6b-c; Supp Fig S5c-d**. **C)** Relative standard deviation (RSD) of GAPDH across all patient samples, sorted by age of patient. Average RSD is 0.75% ± 0.48%. **D)** Patient-by-patient expression (shown via LOG<sub>2</sub>(2<sup>-ΔCt</sup>), as normalized to GAPDH expression), organized by patient disease category. Norm: Normal; pCAVS: pediatric CAVS; aCAVS: adult CAVS; R: pulmonary valve by Ross procedure (**Fig. 6b**). **E)** Patient-by-patient expression (shown via LOG<sub>2</sub>(2<sup>-ΔCt</sup>), as normalized to GAPDH expression), of CAVS patients organized by pediatric age classification (**Fig 6c; Table 1; Supplemental Table S7**)

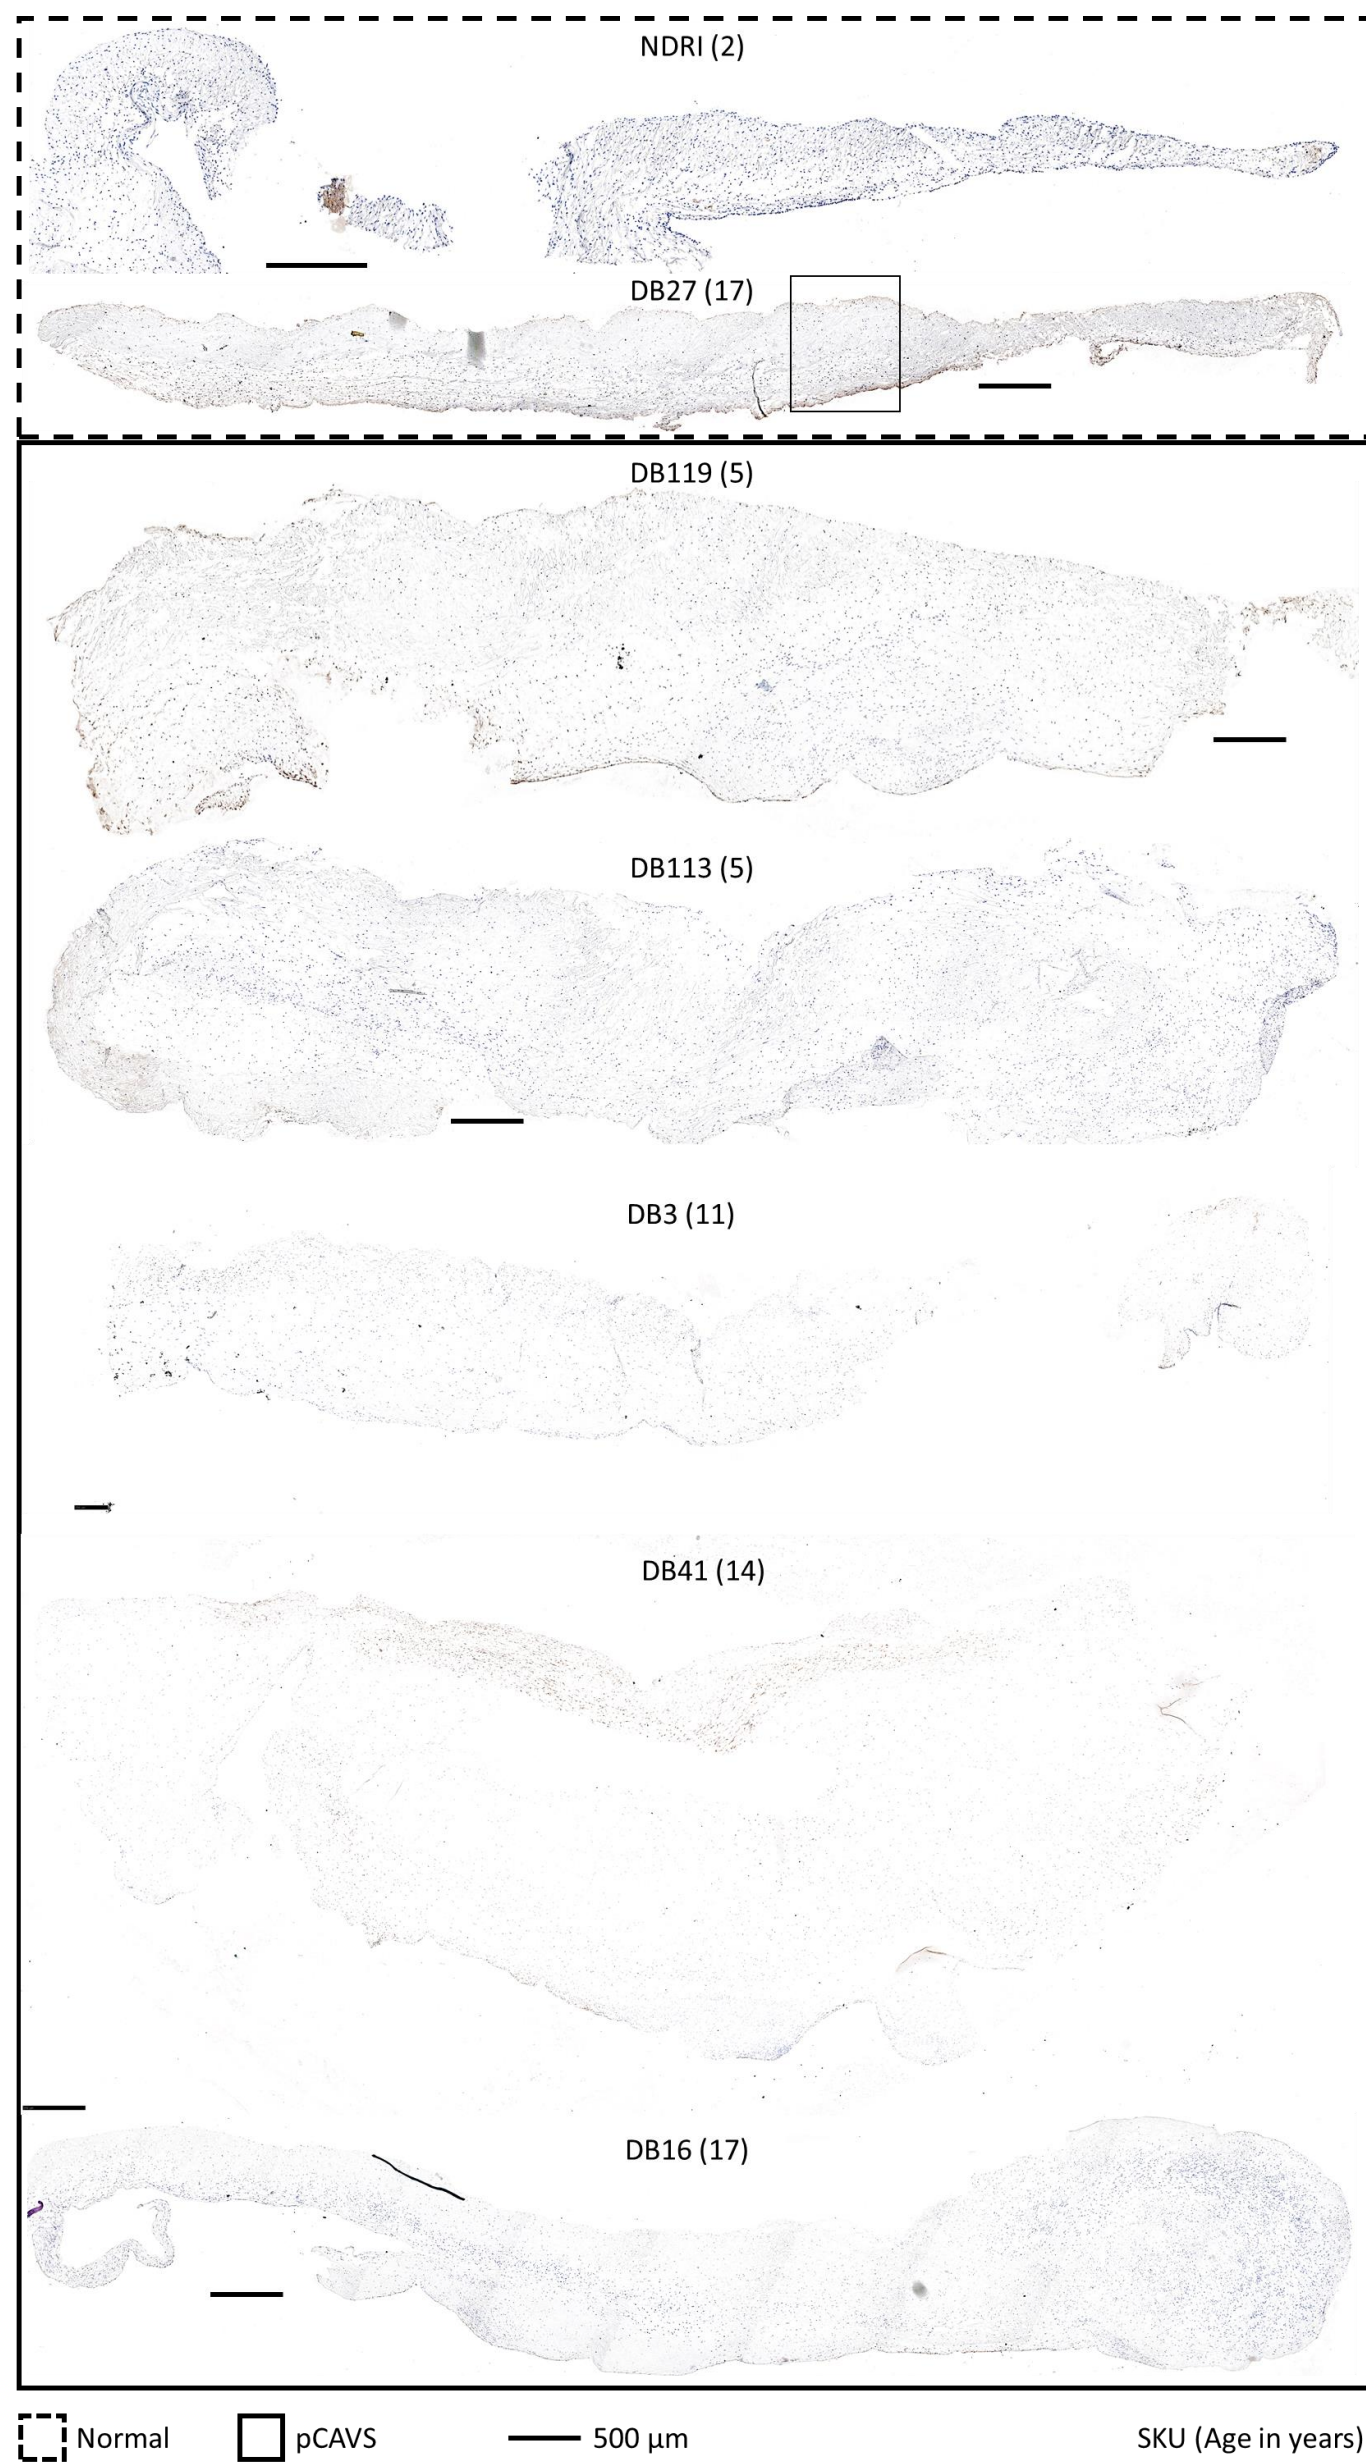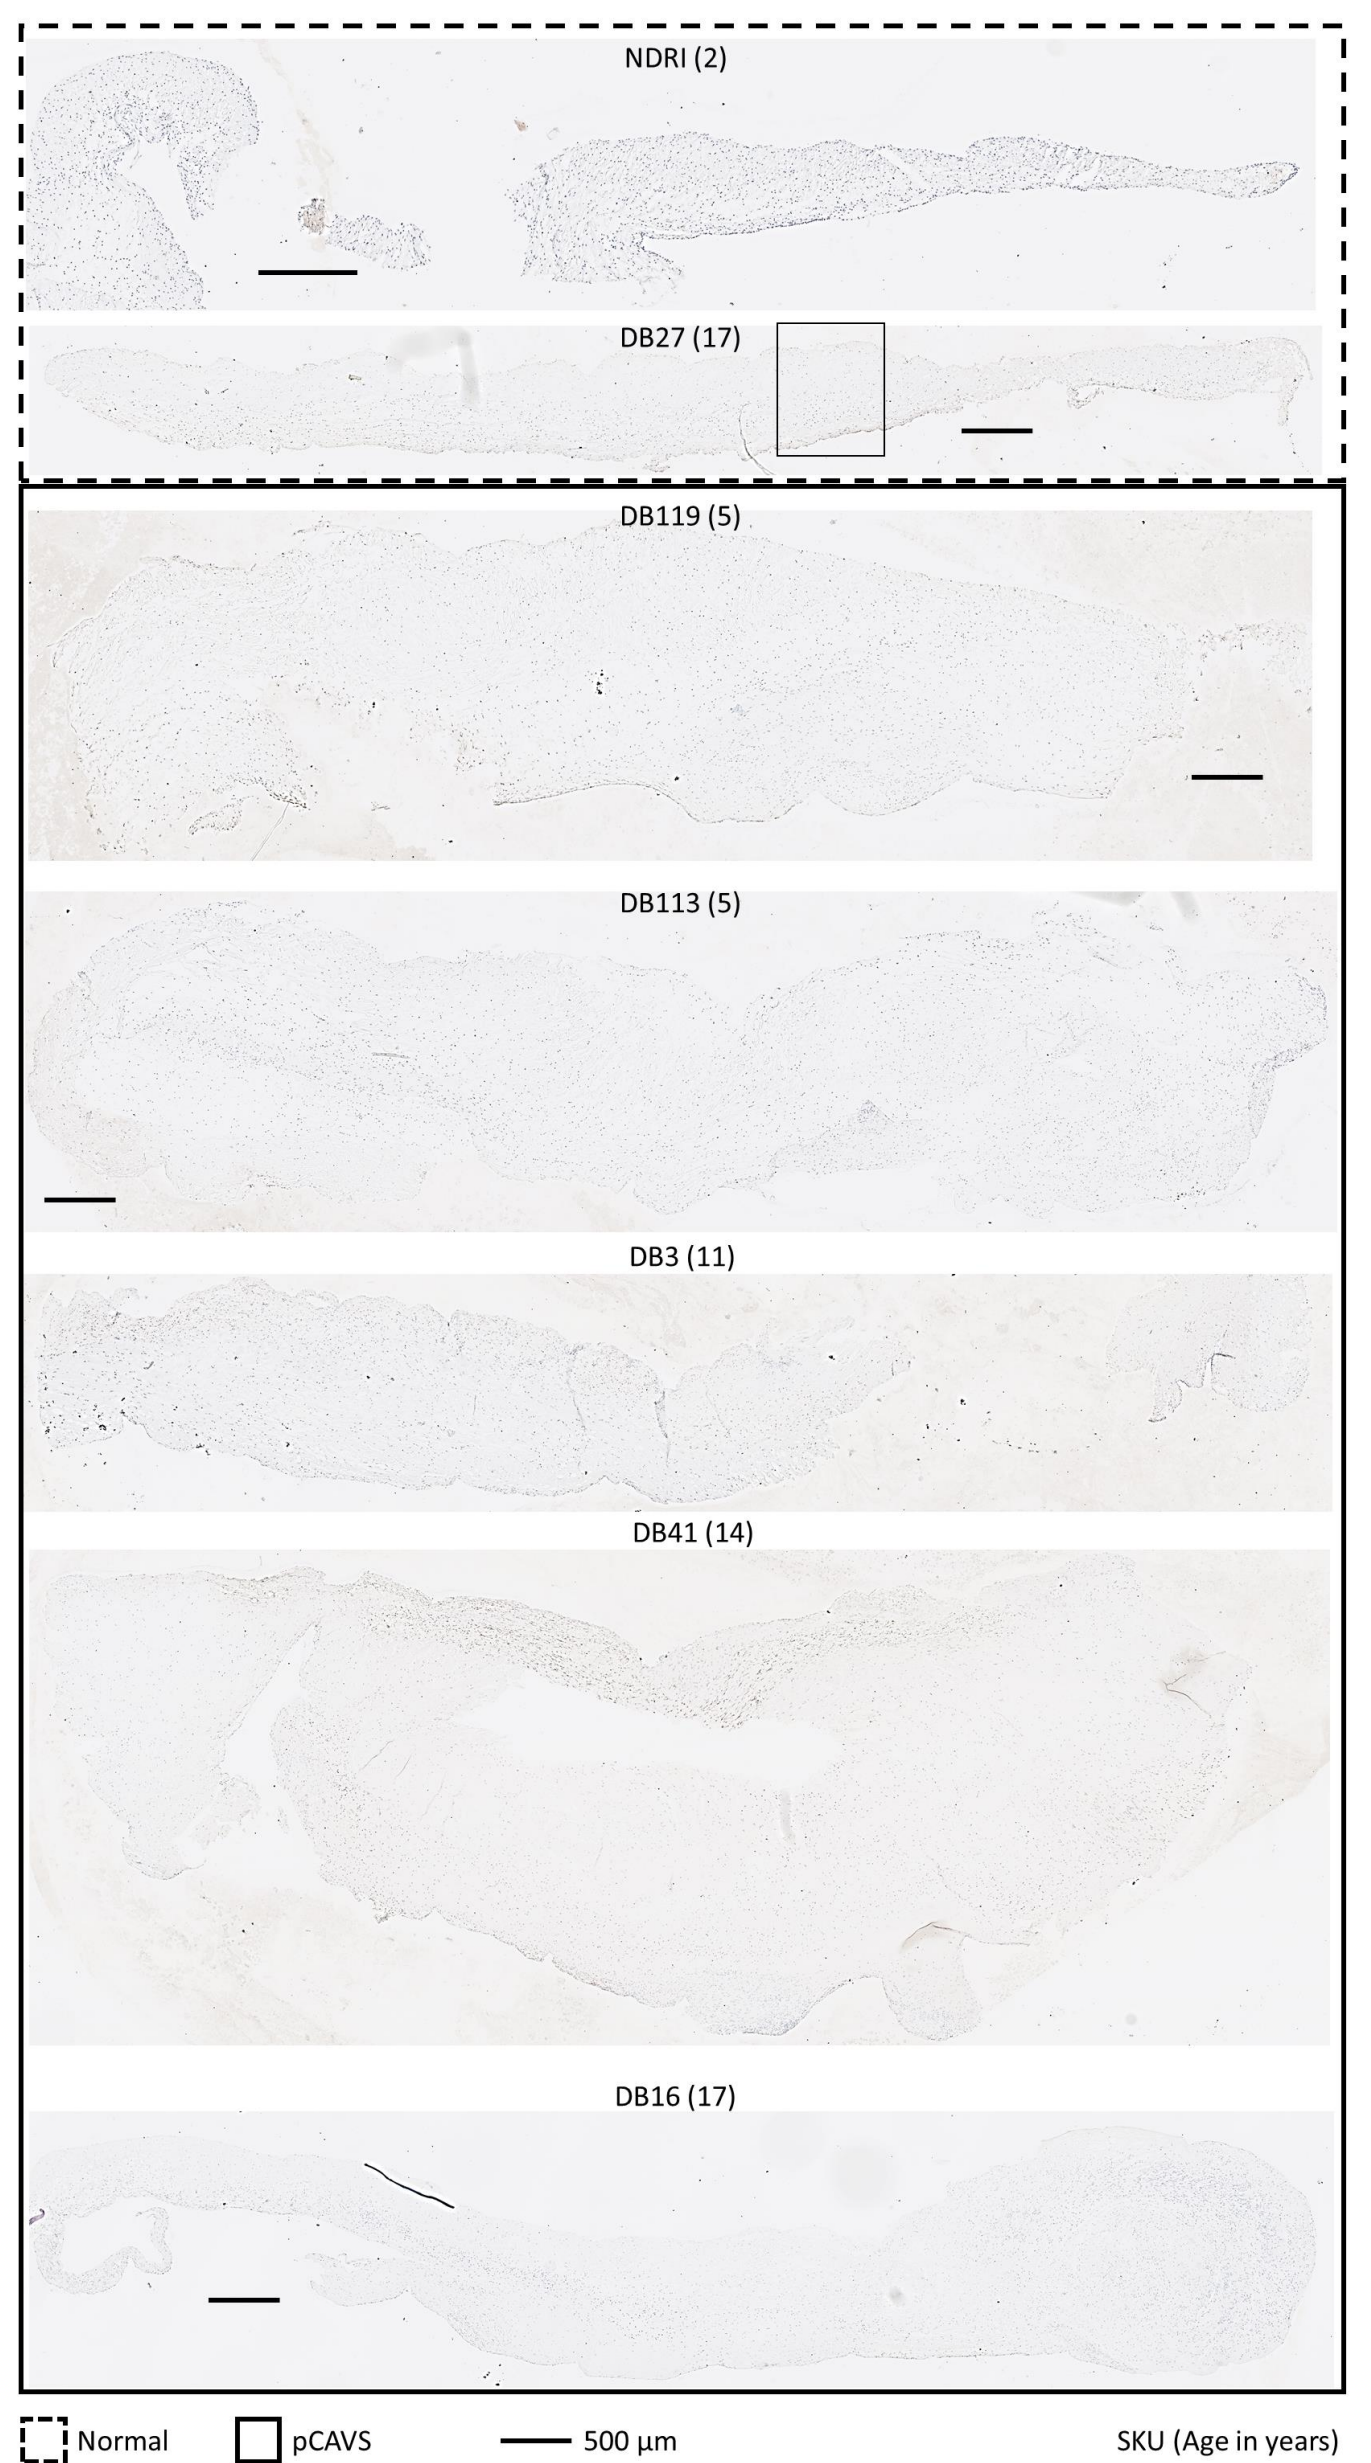

**Supplemental Figure S6:** Immunohistochemistry images with primary antibody BAMBI (chromogen, brown). Mayer's hematoxylin (blue) was used as a counterstain. Background subtracted samples are shown on the left, with raw images shown on the right.

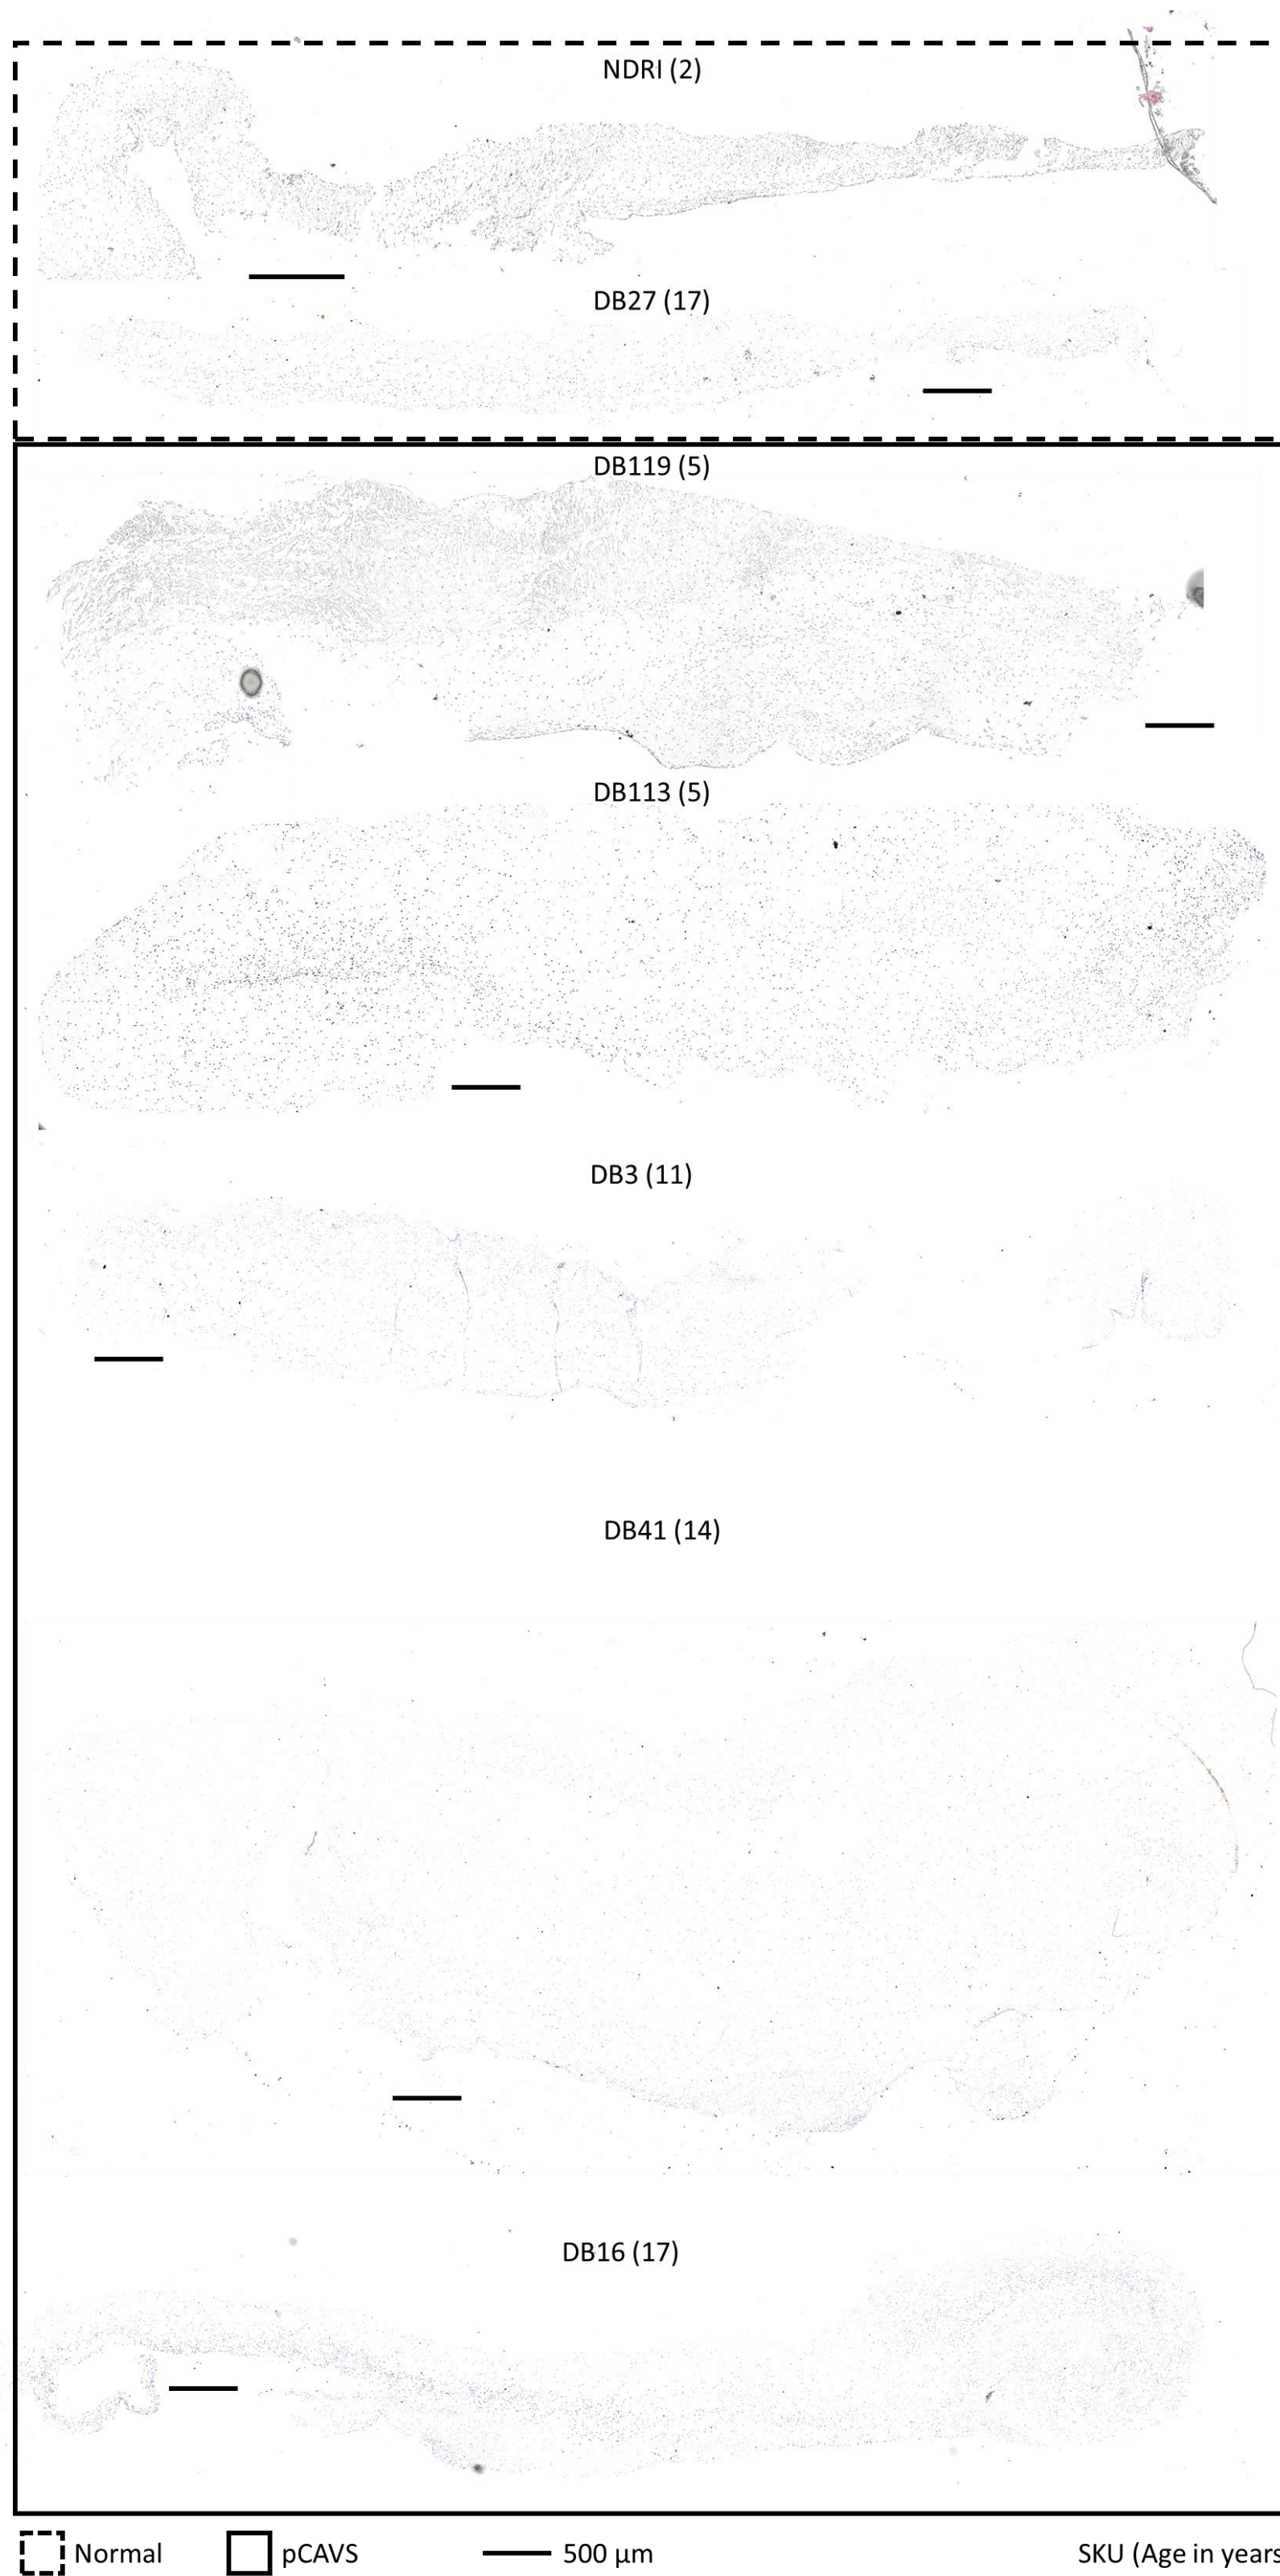

**Supplemental Figure S7:** Immunohistochemistry images of negative controls corresponding to images in Supplementary Fig. S6. No primary antibody was used. Mayer's hematoxylin (blue) was used as a counterstain.



Supplementary Table S1: Normal peptides identified with a LOG2(Fold Change) intensity value greater than 2 compared to pCAVS. PEP: Posterior error probability.

| Protein Name                                      | Uniprot Accession Number | Uniprot Name | Gene Name | Sequence              | Oxidation (P) | Oxidation (P) Probabilities                             | Charges | Mass      | PEP   | MQ Peptide |           | MS/MS Count | Normal Log     | pCAVS Log      | AVI Log        |
|---------------------------------------------------|--------------------------|--------------|-----------|-----------------------|---------------|---------------------------------------------------------|---------|-----------|-------|------------|-----------|-------------|----------------|----------------|----------------|
|                                                   |                          |              |           |                       |               |                                                         |         |           |       | Score      | Intensity |             | Transform Mean | Transform Mean | Transform Mean |
| Basement membrane-specific heparan sulfate proteo | P98160                   | PGBM_HUMAN   | HSPG2     | LVNFTRSIEYSPQLEDAGSRE | 0             |                                                         | 3       | 2411.1605 | 0.000 | 122.8      | 2.E+07    | 4           | 2.325          | -0.505         | 0.617          |
| Basement membrane-specific heparan sulfate proteo | P98160                   | PGBM_HUMAN   | HSPG2     | NPSVOQGQCLPETNQAPL    | 1             | NP(0.5)SVQGGQCLP(0.014)ETNQAP(0.486)L                   | 2       | 1885.8364 | 0.034 | 81.7       | 3.E+06    | 1           | 1.347          | -1.029         | NaN            |
| Biglycan                                          | P21810                   | PGS1_HUMAN   | BGN       | LHSNNITKVG            | 0             |                                                         | 2       | 1082.5720 | 0.088 | 88.8       | 4.E+05    | 1           | -1.762         | -4.009         | -2.481         |
| Collagen alpha-1(I) chain                         | P02452                   | CO1A1_HUMAN  | COL1A1    | FLPQPPQEKAHDGGR       | 1             | FLP(0.004)QP(0.195)P(0.801)QEKAHDGGR                    | 2,3     | 1691.8380 | 0.025 | 87.7       | 2.E+07    | 4           | 1.623          | -0.460         | -0.201         |
| Collagen alpha-1(I) chain                         | P02452                   | CO1A1_HUMAN  | COL1A1    | GKDGLNGLP             | 0             |                                                         | 1       | 870.4447  | 0.027 | 108.5      | 4.E+06    | 5           | 1.671          | -0.993         | -2.153         |
| Collagen alpha-1(I) chain                         | P02452                   | CO1A1_HUMAN  | COL1A1    | GSPGEGAPGQMGPR        | 1             | GSP(0.5)GENGAP(0.5)GQMGPR                               | 2       | 1444.5889 | 0.014 | 97.5       | 3.E+05    | 4           | -1.081         | -3.205         | NaN            |
| Collagen alpha-1(I) chain                         | P02452                   | CO1A1_HUMAN  | COL1A1    | IAGAPGFPGAR           | 2             | IAGAP(0.5)GFFP(0.5)GAR                                  | 2       | 1044.5352 | 0.007 | 111.8      | 6.E+06    | 10          | 1.257          | -0.737         | -1.330         |
| Collagen alpha-1(I) chain                         | P02452                   | CO1A1_HUMAN  | COL1A1    | POPPQEKAHDGGR         | 0             |                                                         | 3       | 1415.6906 | 0.162 | 83.1       | 8.E+05    | 1           | 1.076          | -5.239         | NaN            |
| Collagen alpha-1(III) chain                       | P02461                   | CO3A1_HUMAN  | COL3A1    | ADGVPKDGPR            | 2             |                                                         | 2       | 1067.5360 | 0.078 | 85.3       | 1.E+05    | 1           | -1.483         | -4.338         | NaN            |
| Collagen alpha-1(III) chain                       | P02461                   | CO3A1_HUMAN  | COL3A1    | GEPGRDGNPGSDGLPGRDGS  | 4             | GEP(1)GRDGNP(1)GSDGLP(1)GRDGS(1)                        | 3       | 2056.8682 | 0.000 | 118.7      | 2.E+06    | 7           | 0.687          | -2.264         | -4.536         |
| Collagen alpha-1(III) chain                       | P02461                   | CO3A1_HUMAN  | COL3A1    | GEPGRDGNPGSDGLPGRDGS  | 1             | GEP(0.25)GRDGNP(0.25)GSDGLP(0.25)GRDGS(0.25)            | 3       | 2056.8682 | 0.000 | 133.9      | 1.E+06    | 3           | 1.250          | -1.104         | NaN            |
| Collagen alpha-1(III) chain                       | P02461                   | CO3A1_HUMAN  | COL3A1    | GPGADGVPKDGPR         | 1             | GGP(1)GADGVPKDGPR                                       | 3       | 1351.6480 | 0.017 | 88.0       | 2.E+06    | 4           | 0.231          | -3.189         | -4.848         |
| Collagen alpha-1(III) chain                       | P02461                   | CO3A1_HUMAN  | COL3A1    | GLKGENGLPGENGAPGPM    | 1             | GLKGENGLP(0.5)GENGAP(0.25)GP(0.25)M                     | 2       | 1743.7621 | 0.000 | 234.8      | 6.E+06    | 18          | 2.095          | -0.397         | NaN            |
| Collagen alpha-1(IV) chain                        | P02462                   | CO4A1_HUMAN  | COL4A1    | QPGPKGDPGI            | 2             | QP(1)GP(0.999)KGD(0.001)GI                              | 1       | 996.4876  | 0.091 | 88.4       | 1.E+06    | 4           | 1.678          | -1.958         | -0.703         |
| Collagen alpha-1(V) chain                         | P20908                   | CO5A1_HUMAN  | COL5A1    | GETGDVGQMGPP          | 2             | GETGDVGQMGPP(0.224)P(0.776)                             | 1       | 1175.4765 | 0.048 | 91.3       | 2.E+05    | 1           | -1.680         | -4.722         | NaN            |
| Collagen alpha-1(V) chain                         | P20908                   | CO5A1_HUMAN  | COL5A1    | GLQGPVGLP             | 1             | GLQGPVGLP(1)                                            | 1       | 852.4705  | 0.118 | 83.6       | 1.E+07    | 3           | 2.498          | 0.273          | 0.355          |
| Collagen alpha-1(VI) chain                        | P12109                   | CO6A1_HUMAN  | COL6A1    | FLTAGRTDPAHDVDR       | 0             |                                                         | 3       | 1554.7903 | 0.122 | 100.2      | 4.E+06    | 2           | 0.523          | -1.661         | -1.499         |
| Collagen alpha-1(VI) chain                        | P12109                   | CO6A1_HUMAN  | COL6A1    | GEAGDEGNPDPGAPGERGGPC | 1             | GEAGDEGNP(0.001)GP(0.005)DGAP(0.496)GERGGP(0.498)GI     | 3       | 2265.9483 | 0.044 | 89.7       | 1.E+05    | 2           | -1.934         | -4.896         | NaN            |
| Collagen alpha-1(VI) chain                        | P12109                   | CO6A1_HUMAN  | COL6A1    | LTAGRTDPAHDVDR        | 0             |                                                         | 3       | 1407.7219 | 0.033 | 100.4      | 6.E+06    | 6           | 0.524          | -1.646         | -0.103         |
| Collagen alpha-1(VI) chain                        | P12109                   | CO6A1_HUMAN  | COL6A1    | VAVVQVSGTQQRPERA      | 0             |                                                         | 2,3     | 1844.9493 | 0.033 | 80.9       | 1.E+07    | 7           | 2.550          | -0.394         | 1.859          |
| Collagen alpha-1(XI) chain                        | P12107                   | CO8A1_HUMAN  | COL11A1   | MGPQEGPQQQGN          | 1             | MGP(0.004)QGEP(0.831)GP(0.134)P(0.032)GQQQGN            | 2       | 1466.6096 | 0.060 | 76.3       | 6.E+06    | 3           | 1.044          | -1.134         | NaN            |
| Collagen alpha-1(XVII) chain                      | Q07092                   | COG1A1_HUMAN | COL16A1   | GLAGEPGP              | 0             |                                                         | 1       | 696.3443  | 0.143 | 77.7       | 4.E+05    | 1           | -0.018         | -3.272         | NaN            |
| Collagen alpha-1(XVIII) chain                     | P39060                   | CO1A1_HUMAN  | COL18A1   | GPPGFQPFDFLQ          | 1             | GP(0.5)P(0.5)GQFPDFLQ                                   | 2       | 1364.6401 | 0.011 | 119.7      | 1.E+06    | 1           | 0.563          | -4.107         | -1.940         |
| Collagen alpha-1(XVIII) chain                     | P39060                   | CO1A1_HUMAN  | COL18A1   | GRFVNSDSDVPGPA        | 0             |                                                         | 2       | 1359.6419 | 0.027 | 103.2      | 8.E+05    | 1           | 1.275          | -2.657         | NaN            |
| Collagen alpha-2(I) chain                         | P08123                   | CO1A2_HUMAN  | COL1A2    | GARGSDGVSVPV          | 2             |                                                         | 2       | 1057.5152 | 0.002 | 134.2      | 6.E+06    | 18          | 1.669          | -1.130         | -2.907         |
| Collagen alpha-2(I) chain                         | P08123                   | CO1A2_HUMAN  | COL1A2    | GAVGSPGVNGAPGEA       | 0             | GAVGSP(1)GVNGAP(1)GEA                                   | 1,2     | 1271.5630 | 0.000 | 166.1      | 1.E+07    | 34          | 2.111          | -0.500         | -2.597         |
| Collagen alpha-2(I) chain                         | P08123                   | CO1A2_HUMAN  | COL1A2    | GAVGSPGVNGAPGEA       | 3             | GAVGSP(1)GVNGAP(1)GEAGRDGNP(1)                          | 2       | 1883.8246 | 0.000 | 126.1      | 8.E+05    | 11          | -0.781         | -3.090         | -4.866         |
| Collagen alpha-2(I) chain                         | P08123                   | CO1A2_HUMAN  | COL1A2    | GSPGVNGAPGEAGRDGNP    | 3             | GSP(1)GVNGAP(1)GEAGRDGNP(0.012)GNDGP(0.494)P(0.494)     | 2       | 2193.9159 | 0.000 | 113.3      | 1.E+05    | 2           | -2.024         | -4.749         | NaN            |
| Collagen alpha-2(I) chain                         | P08123                   | CO1A2_HUMAN  | COL1A2    | GSPGVNGAPGEAGRDGNP    | 2             | GSP(0.5)GVNGAP(0.5)GEAGRDGNP(0.492)GNDGP(0.254)P(0.254) | 2       | 2209.9108 | 0.000 | 145.7      | 9.E+05    | 13          | -1.047         | -2.995         | NaN            |
| Collagen alpha-2(I) chain                         | P08123                   | CO1A2_HUMAN  | COL1A2    | LVGEPGPA              | 1             | LVGEP(1)GPA                                             | 1       | 754.3861  | 0.048 | 106.8      | 9.E+06    | 21          | 1.705          | -0.824         | -0.352         |
| Collagen alpha-2(I) chain                         | P08123                   | CO1A2_HUMAN  | COL1A2    | SPGVNGAPGEA           | 2             | GSP(0.5)GVNGAP(0.5)GEAGRDGNP(0.492)GNDGP(0.254)P(0.254) | 1       | 900.3825  | 0.036 | 99.1       | 5.E+05    | 4           | -0.046         | -2.481         | NaN            |
| Collagen alpha-2(I) chain                         | P08123                   | CO1A2_HUMAN  | COL1A2    | SPGVNGAPGEA           | 2             | SP(1)GVNGAP(1)GEA                                       | 1       | 987.4145  | 0.095 | 82.7       | 1.E+05    | 1           | -2.541         | -4.824         | NaN            |
| Collagen alpha-2(VI) chain                        | P12110                   | CO6A2_HUMAN  | COL6A2    | LANMTEQIR             | 2             |                                                         | 2       | 1075.5332 | 0.016 | 88.2       | 3.E+06    | 2           | -0.565         | -2.723         | -1.652         |
| Collagen alpha-2(VI) chain                        | P12110                   | CO6A2_HUMAN  | COL6A2    | LDGSERLGEON           | 2             |                                                         | 2       | 1216.5684 | 0.021 | 99.8       | 2.E+05    | 3           | -1.145         | -4.243         | -5.432         |
| Collagen alpha-2(VI) chain                        | P12110                   | CO6A2_HUMAN  | COL6A2    | LYRNDYAT              | 0             |                                                         | 2       | 1015.4611 | 0.134 | 79.7       | 2.E+06    | 1           | 1.298          | -2.462         | -3.148         |
| Collagen alpha-3(VI) chain                        | P12111                   | CO6A3_HUMAN  | COL6A3    | FDDEYQPEMLEKFR        | 0             |                                                         | 2,3     | 2008.8877 | 0.005 | 112.4      | 6.E+07    | 29          | 3.658          | 1.615          | 1.560          |
| Collagen alpha-3(VI) chain                        | P12111                   | CO6A3_HUMAN  | COL6A3    | HANTKVGLEHLR          | 0             |                                                         | 3       | 1373.7528 | 0.052 | 89.4       | 4.E+05    | 2           | -2.426         | -5.142         | -5.191         |
| Collagen alpha-3(VI) chain                        | P12111                   | CO6A3_HUMAN  | COL6A3    | PEVPRPQAAKPA          | 3             | P(1)EVP(1)RP(1)QAAKPA                                   | 2       | 1307.6834 | 0.065 | 84.2       | 3.E+06    | 2           | 2.204          | -1.657         | NaN            |
| Collagen alpha-3(VI) chain                        | P12111                   | CO6A3_HUMAN  | COL6A3    | PLRLNLLLDIYE          | 2             |                                                         | 2       | 1472.7875 | 0.002 | 120.3      | 7.E+05    | 1           | 0.886          | -1.794         | -2.687         |
| Dentin sialophosphoprotein                        | Q9NZW4                   | DSPP_HUMAN   | DSPP      | RSNTNGNTDKNTQNGDV     | 0             |                                                         | 2       | 1838.7402 | 0.022 | 88.3       | 2.E+06    | 2           | 0.426          | -1.956         | NaN            |
| Fibromodulin                                      | Q06828                   | FMOD_HUMAN   | FMOD      | LHLHDHNIQR            | 3             |                                                         | 3       | 1231.6422 | 0.074 | 106.4      | 3.E+06    | 4           | 0.752          | -1.649         | -1.853         |
| Fibromodulin                                      | Q06828                   | FMOD_HUMAN   | FMOD      | LRELHLDHNIQR          | 0             |                                                         | 3       | 1273.6527 | 0.138 | 90.1       | 2.E+06    | 2           | -0.259         | -2.861         | -4.221         |
| Fibromodulin                                      | Q06828                   | FMOD_HUMAN   | FMOD      | LYLDHNLNTR            | 0             |                                                         | 2,3     | 1258.6306 | 0.011 | 111.1      | 1.E+07    | 6           | 2.403          | 0.070          | -0.457         |
| Fibronectin                                       | P02751                   | FN1_HUMAN    | FN1       | NLAPDSSSVVSG          | 1             | NLAP(1)DSSSVVSG                                         | 2       | 1247.5881 | 0.062 | 81.3       | 4.E+06    | 4           | 1.811          | -1.432         | -2.549         |
| Tenascin-X                                        | P22105                   | TENX_HUMAN   | TNKB      | LLETTVTRTE            | 0             |                                                         | 2       | 1189.6190 | 0.016 | 105.5      | 2.E+06    | 2           | -0.110         | -2.022         | -1.880         |
| Vimentin                                          | P08670                   | VIME_HUMAN   | VIM       | KNLQEAEEWYKSK         | 0             |                                                         | 3       | 1651.8206 | 0.000 | 161.2      | 8.E+06    | 12          | 1.368          | -0.746         | -0.918         |

**Supplemental Table S2:** pCAVS peptides identified with a LOG2(Fold Change) intensity value greater than 2 compared to Normal. PEP: Posterior error probability.

| Protein Name                                                         | Uniprot Accession Number | Uniprot Name             | Gene Name       | Sequence                            | Oxidation (P) | Oxidation (P) Probabilities                       | Charges | Mass      | PEP   | MQ Peptide |           | MS/MS Count | Normal Log Transform Mean | pCAVS Log Transform Mean | AVI Log Transform Mean |
|----------------------------------------------------------------------|--------------------------|--------------------------|-----------------|-------------------------------------|---------------|---------------------------------------------------|---------|-----------|-------|------------|-----------|-------------|---------------------------|--------------------------|------------------------|
|                                                                      |                          |                          |                 |                                     |               |                                                   |         |           |       | Score      | Intensity |             |                           |                          |                        |
| Asporin                                                              | Q9BXN1                   | ASP_N_HUMAN              | ASP_N           | SEIPLNLPKS                          | 0             |                                                   | 1       | 1096.6128 | 0.007 | 120.3      | 4.E+06    | 7           | -2.1048                   | 0.1160                   | NaN                    |
| Basement membrane-specific heparan sulfate proteoglycan core protein |                          |                          |                 |                                     |               |                                                   |         |           |       |            |           |             |                           |                          |                        |
| Biglycan                                                             | P21810                   | PGS1_HUMAN               | BCN             | LAPTNEAFKIPSETLNR                   | 0             |                                                   | 2,3     | 2029.0480 | 0.040 | 79.8       | 7.E+07    | 6           | 0.1579                    | 2.4777                   | 1.1328                 |
| Biglycan                                                             | P21810                   | PGS1_HUMAN               | BCN             | ILEDLRLYSKLYR                       | 0             |                                                   | 3       | 1809.9889 | 0.092 | 73.8       | 1.E+07    | 2           | -0.9563                   | 1.4436                   | -0.9051                |
| Biglycan                                                             | P21810                   | PGS1_HUMAN               | BCN             | LARVPSGLPDLK                        | 0             |                                                   | 2,3     | 1264.7503 | 0.003 | 136.3      | 7.E+07    | 38          | -0.5734                   | 1.6439                   | 1.6777                 |
| Collagen alpha-1(I) chain                                            | P02452                   | CO1A1_HUMAN              | COL1A1          | GLPGTAGLP                           | 2             | GLP(1)GTAGLP(1)                                   | 1,2     | 813.4232  | 0.009 | 126.2      | 2.E+08    | 21          | 0.8426                    | 4.3823                   | -0.9657                |
| Collagen alpha-1(I) chain                                            | P02452                   | CO1A1_HUMAN              | COL1A1          | PPOEKADGGRRY                        | 0             |                                                   | 2       | 1516.7059 | 0.049 | 85.8       | 8.E+07    | 5           | -0.2527                   | 2.1825                   | 1.0390                 |
| Collagen alpha-1(III) chain                                          | P02461                   | CO3A1_HUMAN              | COL3A1          | FAPYYG                              | 0             |                                                   | 1       | 716.3170  | 0.158 | 77.5       | 6.E+07    | 2           | -1.6375                   | 2.8232                   | 1.1229                 |
| Collagen alpha-1(III) chain                                          | P02461                   | CO3A1_HUMAN              | COL3A1          | GAPGLKGENGLP                        | 1             | GAP(0.5)GLKGENGLP(0.5)                            | 2       | 1125.5666 | 0.029 | 96.1       | 8.E+07    | 11          | -3.4981                   | 3.7819                   | 2.7979                 |
| Collagen alpha-1(III) chain                                          | P02461                   | CO3A1_HUMAN              | COL3A1          | GLAGTAGEP(1)GRDGNP(1)GSDGLP(1)      | 3             |                                                   | 2       | 1942.8504 | 0.000 | 123.1      | 2.E+06    | 1           | -2.2755                   | -0.1059                  | NaN                    |
| Collagen alpha-1(III) chain                                          | P02461                   | CO3A1_HUMAN              | COL3A1          | GLKGENGLP                           | 1             | GLKGENGLP(1)                                      | 2       | 900.4553  | 0.029 | 107.3      | 1.E+07    | 9           | -3.1905                   | 1.1839                   | 0.2164                 |
| Collagen alpha-1(III) chain                                          | P02461                   | CO3A1_HUMAN              | COL3A1          | GQPGVMGFP                           | 2             | GQP(1)GVMGFP(1)                                   | 1,2     | 936.4011  | 0.017 | 118.0      | 8.E+07    | 19          | 1.0131                    | 3.3746                   | -0.4589                |
| Collagen alpha-1(III) chain                                          | P02461                   | CO3A1_HUMAN              | COL3A1          | GQPGVMGFP                           | 1             | GQPGVMGFP(1)                                      | 1,2     | 936.4011  | 0.020 | 113.1      | 1.E+07    | 10          | -1.1158                   | 2.2727                   | -0.0280                |
| Collagen alpha-1(III) chain                                          | P02461                   | CO3A1_HUMAN              | COL3A1          | GRPGRGPERGLPGPPGKIGKPA              | 1             | GRP(0.061)GRP(0.935)GERGLP(0.003)GP(0.001)PGIKGPA | 2       | 2038.1184 | 0.056 | 78.5       | 9.E+06    | 1           | -1.7151                   | 0.3776                   | 0.0850                 |
| Collagen alpha-1(III) chain                                          | P02461                   | CO3A1_HUMAN              | COL3A1          | LAGTAGEP(0.5)GRDGNP(0.5)GSDGLP(0.5) | 1             |                                                   | 2       | 1868.8500 | 0.000 | 132.2      | 2.E+07    | 32          | -1.5434                   | 2.5790                   | 0.1992                 |
| Collagen alpha-1(IV) chain                                           | P02461                   | CO3A1_HUMAN              | COL3A1          | VAVGGLAGYPPG                        | 1             | VAVGGLAGYPP(0.5)GP(0.5)                           | 1       | 1088.5502 | 0.148 | 71.7       | 2.E+07    | 1           | -2.1409                   | -0.0839                  | 2.2532                 |
| Collagen alpha-1(IV) chain                                           | P02462                   | CO4A1_HUMAN              | COL4A1          | DGLPGDMGPPG                         | 0             |                                                   | 1       | 1011.4331 | 0.158 | 73.7       | 2.E+07    | 1           | -0.8143                   | 1.6616                   | -1.7121                |
| Collagen alpha-1(V) chain                                            | P20908                   | CO5A1_HUMAN              | COL5A1          | GAPGKPGDGL                          | 1             | GAP(0.5)GKPG(0.452)GP(0.048)DGL                   | 1       | 980.4927  | 0.058 | 90.7       | 1.E+07    | 12          | -1.3273                   | 1.2474                   | 0.0534                 |
| Collagen alpha-1(V) chain                                            | P20908; P12107           | CO5A1_HUMAN; COBA1_HUMAN | COL5A1; COL11A1 | GPPGTMLMLP                          | 1             | GP(0.5)P(0.5)GTMMLP                               | 1,2     | 1044.4984 | 0.000 | 138.4      | 5.E+07    | 40          | -1.5024                   | 1.2157                   | 0.5055                 |
| Collagen alpha-1(V) chain                                            | P20908                   | CO5A1_HUMAN              | COL5A1          | GSIGFPFG                            | 2             | GSIGFP(1)GFP(1)                                   | 1       | 909.4232  | 0.030 | 106.8      | 6.E+06    | 7           | 0.5141                    | 2.8417                   | -0.7466                |
| Collagen alpha-1(V) chain                                            | P12109                   | CO6A1_HUMAN              | COL6A1          | IDTIVDMKNNVEQV                      | 0             |                                                   | 2       | 1729.8920 | 0.000 | 178.7      | 3.E+06    | 6           | -2.8423                   | -0.5475                  | -2.4121                |
| Collagen alpha-1(V) chain                                            | P12109                   | CO6A1_HUMAN              | COL6A1          | LVTIDGRSDTQRDTPLNV                  | 0             |                                                   | 2,3     | 2100.0811 | 0.037 | 59.2       | 4.E+07    | 2           | -1.0554                   | 1.2432                   | 1.4888                 |
| Collagen alpha-1(V) chain                                            | P12109                   | CO6A1_HUMAN              | COL6A1          | QYSHSQMGEHS                         | 0             |                                                   | 2       | 1459.6150 | 0.048 | 52.7       | 1.E+07    | 8           | -2.6176                   | -0.0316                  | -0.5003                |
| Collagen alpha-1(XIV) chain                                          | Q05707                   | COEA1_HUMAN              | COL14A1         | VFTTEEVPAQQVLEIDVTTDSFR             | 0             |                                                   | 2,3     | 2816.3392 | 0.000 | 166.7      | 6.E+06    | 11          | -2.4274                   | -0.3436                  | -0.8350                |
| Collagen alpha-2(I) chain                                            | P08123                   | CO1A2_HUMAN              | COL1A2          | GARGLPERGRVGA                       | 1             | GARGLP(1)GERGRVGA                                 | 2       | 1618.8652 | 0.113 | 69.3       | 1.E+08    | 1           | 0.7930                    | 2.8586                   | 0.4042                 |
| Collagen alpha-2(I) chain                                            | P08123                   | CO1A2_HUMAN              | COL1A2          | GSPGSPGLPER                         | 1             | GSPGSPGLP(1)GER                                   | 2       | 1125.5410 | 0.028 | 97.8       | 4.E+05    | 1           | -2.7069                   | -0.1752                  | -4.5097                |
| Collagen alpha-2(I) chain                                            | P08123                   | CO1A2_HUMAN              | COL1A2          | GSPGNIGPAGKGPVGLPGIDGRP             | 3             | GSP(1)GNIGPAGKGP(0.002)VGLP(0.998)GIDGRP(1)       | 3       | 2246.1291 | 0.064 | 86.0       | 5.E+06    | 1           | -3.0070                   | -0.1115                  | NaN                    |
| Collagen alpha-2(I) chain                                            | P08123                   | CO1A2_HUMAN              | COL1A2          | GVRGPGDAGRPGEPLM                    | 2             | GPAGVRGPGDAGRP(1)GEP(1)GLM                        | 2,3     | 1794.8112 | 0.019 | 91.1       | 5.E+06    | 3           | -2.9732                   | -0.3157                  | -1.1215                |
| Collagen alpha-2(I) chain                                            | P08123                   | CO1A2_HUMAN              | COL1A2          | SGGVDFYVGDYFRA                      | 0             |                                                   | 2       | 1745.6958 | 0.000 | 145.2      | 1.E+07    | 14          | -1.6850                   | 0.7243                   | NaN                    |
| Collagen alpha-2(I) chain                                            | P08123                   | CO1A2_HUMAN              | COL1A2          | VGLGPGPMG                           | 0             |                                                   | 1       | 799.3898  | 0.152 | 77.9       | 2.E+06    | 2           | -2.5026                   | -0.2940                  | NaN                    |
| Collagen alpha-2(V) chain                                            | P05997                   | CO5A2_HUMAN              | COL5A2          | GPVSPGLP                            | 3             | GP(1)VGSP(1)GLP(1)                                | 1       | 827.4025  | 0.091 | 89.7       | 6.E+07    | 6           | 3.2119                    | 5.2425                   | NaN                    |
| Collagen alpha-2(V) chain                                            | P12110                   | CO6A2_HUMAN              | CO6A2           | FSHVAG                              | 0             |                                                   | 1       | 673.3184  | 0.036 | 104.9      | 1.E+06    | 3           | -3.8602                   | -1.1458                  | NaN                    |
| Collagen alpha-2(V) chain                                            | P12110                   | CO6A2_HUMAN              | CO6A2           | LGSDVDMVLT                          | 0             |                                                   | 1,2     | 1280.5806 | 0.013 | 111.0      | 8.E+07    | 40          | 0.2976                    | 2.6329                   | 1.2369                 |
| Collagen alpha-2(V) chain                                            | A6NMZ7                   | CO6A6_HUMAN              | CO6A6           | LLNANLDS                            | 0             |                                                   | 1       | 971.5288  | 0.031 | 106.4      | 1.E+05    | 2           | -3.1398                   | -0.8015                  | NaN                    |
| Collagen alpha-2(V) chain                                            | P12110                   | CO6A2_HUMAN              | CO6A2           | VTMQSPDILL                          | 0             |                                                   | 1,2     | 1216.6373 | 0.013 | 104.0      | 3.E+07    | 10          | -2.1749                   | 0.9699                   | -0.0771                |
| Collagen alpha-3(V) chain                                            | P12111                   | CO6A3_HUMAN              | COL6A3          | AAEGIPKLLV                          | 0             |                                                   | 2       | 1122.7012 | 0.033 | 95.5       | 9.E+06    | 5           | -2.9678                   | 0.2197                   | 0.8449                 |
| Collagen alpha-3(V) chain                                            | P12111                   | CO6A3_HUMAN              | COL6A3          | FMYDRPLRLNLDLDE                     | 1             | FMYDRP(1)LRNLDLDE                                 | 3       | 2201.0827 | 0.023 | 87.5       | 3.E+06    | 1           | -2.1313                   | 0.3091                   | NaN                    |
| Collagen alpha-3(V) chain                                            | P12111                   | CO6A3_HUMAN              | COL6A3          | FRELPSLEQL                          | 2,3           |                                                   | 2,3     | 1358.7558 | 0.000 | 147.7      | 4.E+08    | 61          | 1.1809                    | 3.2767                   | 4.2496                 |
| Collagen alpha-3(V) chain                                            | P12111                   | CO6A3_HUMAN              | COL6A3          | KSVLLDKIKNLQVA                      | 0             |                                                   | 2,3     | 1567.9661 | 0.100 | 73.1       | 4.E+07    | 2           | -0.6385                   | 2.7378                   | 1.6081                 |
| Collagen alpha-3(V) chain                                            | P12111                   | CO6A3_HUMAN              | COL6A3          | LGPTPTNGAALFVFLRN                   | 1             |                                                   | 2       | 1625.9686 | 0.000 | 193.5      | 1.E+07    | 10          | -1.6325                   | 0.5093                   | 0.4463                 |
| Collagen alpha-3(V) chain                                            | P12111                   | CO6A3_HUMAN              | COL6A3          | LOPVLQPLSPGVGKRDVWF                 | 0             |                                                   | 2       | 2202.2525 | 0.000 | 117.1      | 6.E+06    | 7           | -3.0584                   | -0.7657                  | -0.2520                |
| Collagen alpha-3(V) chain                                            | P12111                   | CO6A3_HUMAN              | COL6A3          | LRNLDLDE                            | 0             |                                                   | 2       | 1376.7187 | 0.000 | 136.0      | 3.E+05    | 2           | -4.3541                   | 0.9138                   | -3.1668                |
| Collagen alpha-3(V) chain                                            | P12111                   | CO6A3_HUMAN              | COL6A3          | LTEDTLKIVLYNK                       | -2,3          |                                                   | 2,3     | 1435.7922 | 0.026 | 102.5      | 2.E+07    | 3           | -2.0618                   | 0.1143                   | -0.3290                |
| Collagen alpha-3(V) chain                                            | P12111                   | CO6A3_HUMAN              | COL6A3          | LTLGLGPTNTGAALFVFLRN                | 0             |                                                   | 2       | 2153.1845 | 0.000 | 191.6      | 4.E+06    | 7           | -2.9610                   | -0.6990                  | -0.4187                |
| Collagen alpha-3(V) chain                                            | P12111                   | CO6A3_HUMAN              | COL6A3          | LVLPAGRDLTDFLENV                    | 2             |                                                   | 2       | 1770.9516 | 0.001 | 122.3      | 2.E+07    | 30          | -1.8448                   | 0.5836                   | -1.6825                |
| Collagen alpha-3(V) chain                                            | P12111                   | CO6A3_HUMAN              | COL6A3          | PGEDGYRGYPGDEGGPGER                 | 1             | GIPGEDGYRGYP(0.967)GDEGGP(0.033)GER               | 2,3     | 1979.8246 | 0.046 | 79.3       | 6.E+06    | 5           | -1.7773                   | 0.2732                   | NaN                    |
| Collagen alpha-3(V) chain                                            | P12111                   | CO6A3_HUMAN              | COL6A3          | PGVGGKRDVVF                         | 0             |                                                   | 1       | 1129.6244 | 0.131 | 78.1       | 4.E+06    | 1           | -3.7122                   | -0.5140                  | -1.4834                |
| Collagen alpha-3(V) chain                                            | P12111                   | CO6A3_HUMAN              | COL6A3          | VAQKPFESKVDAILNR                    | 0             |                                                   | 2,3     | 1773.9737 | 0.000 | 139.5      | 2.E+08    | 15          | -1.8115                   | 2.7017                   | 3.0137                 |
| Collagen alpha-3(V) chain                                            | P12111                   | CO6A3_HUMAN              | COL6A3          | VLOPLPSVGGV                         | 0             |                                                   | 1,2     | 1119.6288 | 0.000 | 157.3      | 4.E+07    | 32          | -0.8885                   | 1.4184                   | -0.2886                |
| Collagen alpha-3(V) chain                                            | P12111                   | CO6A3_HUMAN              | COL6A3          | VREFRELPIIEERIMNS                   | 2,3           |                                                   | 2,3     | 2131.0844 | 0.000 | 113.1      | 1.E+08    | 10          | 1.6446                    | 3.9760                   | 2.2189                 |
| Decorin                                                              | P07585                   | PGS2_HUMAN               | DCN             | LHLDNNKLTFRVPGG                     | 3             |                                                   | 3       | 1532.8423 | 0.007 | 125.5      | 2.E+07    | 5           | -1.1238                   | 1.1035                   | -0.3927                |
| Decorin                                                              | P07585                   | PGS2_HUMAN               | DCN             | LILVNKISKVSPGA                      | 0             |                                                   | 2,3     | 1551.9348 | 0.036 | 82.7       | 3.E+07    | 5           | -1.3148                   | 1.1352                   | -0.3433                |
| Fibronectin                                                          | P35555                   | FBN1_HUMAN               | FBN1            | LGPIPPVLVPPGFPP                     | 2             |                                                   | 2       | 1592.9330 | 0.002 | 109.3      | 2.E+07    | 17          | -2.7646                   | -0.6033                  | -1.0630                |
| Fibronectin                                                          | P35555                   | FBN1_HUMAN               | FBN1            | SPNISACIDINEGEL                     | 0             |                                                   | 2       | 1620.7011 | 0.090 | 72.3       | 6.E+06    | 2           | -2.0677                   | 0.5099                   | NaN                    |
| Lumican                                                              | P51884                   | LUM_HUMAN                | LUM             | IARLPSGLP                           | 2             |                                                   | 2       | 922.5600  | 0.114 | 84.6       | 2.E+07    | 1           | -1.9802                   | 0.7323                   | 0.3523                 |
| Lumican                                                              | P51884                   | LUM_HUMAN                | LUM             | IARLPSGLPVSL                        | 0             |                                                   | 2       | 1221.7445 | 0.012 | 119.5      | 8.E+07    | 20          | -0.8069                   | 1.2787                   | 1.5403                 |
| Lumican                                                              | P51884                   | LUM_HUMAN                | LUM             | KNIPVTNENLENY                       | 0             |                                                   | 2       | 1710.8101 | 0.022 | 110.1      | 2.E+07    | 5           | -2.1286                   | 0.1970                   | -1.0631                |
| Lumican                                                              | P51884                   | LUM_HUMAN                | LUM             | LSFNQIARLPSGLPVSL                   | 2             |                                                   | 2       | 1811.0305 | 0.036 | 79.9       | 2.E+06    | 1           | -4.5068                   | -1.2079                  | -3.8748                |
| Microfibril-associated glycoprotein 4                                | P55083                   | MFAP4_HUMAN              | MFAP4           | LIYPSGSPVVP                         | 0             |                                                   | 1,2     | 1224.6754 | 0.002 | 145.6      | 9.E+07    | 29          | 0.0929                    | 2.3167                   | 1.2361                 |
| Serpin H1                                                            | P50454                   | SERPH_HUMAN              | SERPHIN         | RSALQSINAWA                         | 2             |                                                   | 2       | 1275.6095 | 0.030 | 96.0       | 6.E+07    | 4           | -4.1829                   | 5.4669                   | 4.4257                 |
| Tenascin                                                             | P24821                   | TENA_HUMAN               | TNC             | IATVDSYVISYTGKVPETIR                | 3             |                                                   | 3       | 2340.2213 | 0.173 | 69.1       | 9.E+06    | 1           | -2.4106                   | 1.4159                   | -0.9055                |
| Tenascin                                                             | P24821                   | TENA_HUMAN               | TNC             | IKDVPGRDRTTDLTDEDNQYS               | 2,3           |                                                   | 2,3     | 2408.1343 | 0.000 | 90.9       | 2.E+07    | 5           | -1.4715                   | 0.6487                   | 0.7481                 |
| Tenascin                                                             | P24821                   | TENA_HUMAN               | TNC             | NKKSIPVSARVATY                      | 2             |                                                   | 2       | 1533.8515 | 0.121 | 71.0       | 9.E+07    | 1           | -0.2405                   | 1.9431                   | 1.6421                 |
| Tenascin-X                                                           | P22105                   | TENX_HUMAN               | TNXB            | IQFIPTTEGASPPFTARVPS                | 2             |                                                   | 2       | 2202.1321 | 0.000 | 163.9      | 1.E+07    | 11          | -1.5615                   | 0.6085                   | -0.7754                |
| Tenascin-X                                                           | P22105                   | TENX_HUMAN               | TNXB            | LLVDGQSKILISGLEPSTPYRF              | 0             |                                                   | 3       | 2547.3585 | 0.002 | 101.6      | 3.E+06    | 2           | -1.7289                   | 0.7801                   | NaN                    |
| Tenascin-X                                                           | P22105                   | TENX_HUMAN               | TNXB            | MRVPEGPGAHFEVLPGDVRQA               | 3             |                                                   | 3       | 2243.1117 | 0.004 | 109.1      | 1.E+07    | 4           | -1.8527                   | 0.7799                   | 0.7046                 |
| Tenascin-X                                                           | P22105                   | TENX_HUMAN               | TNXB            | WTVPEGQDFH                          | 1,2           |                                                   | 1,2     | 1361.6041 | 0.000 | 160.8      | 2.E+08    | 43          | 0.4036                    | 2.9801                   | 2.2208                 |
| Vimentin                                                             | P08670                   | VIME_HUMAN               | VIM             | AKNLQEAEEWYKSK                      | -2,3          |                                                   | 2,3     | 1722.8577 | 0.000 | 156.0      | 2.E+07    | 11          | -2.1688                   | 0.7391                   | -0.6449                |
| Viment                                                               |                          |                          |                 |                                     |               |                                                   |         |           |       |            |           |             |                           |                          |                        |

**Supplementary Table S3: Proteins identified via Collagenase Type III LC-MS/MS Proteomics. MWU: Mann Whitney U-Test**

| Protein Name                                | Protein Accession Numbers (Uniprot) | Gene Symbol | Normal Peptide counts (all) | pCAVS Peptide counts (all) | AVI Peptide counts (all) | Normal Peptide Counts (unique) | pCAVS Peptide Counts (unique) | AVI Peptide Counts (unique) | Normal Sequence Coverage [%] | pCAVS Sequence Coverage [%] | AVI Sequence Coverage [%] | Normal LOG2 Transform Intensity | pCAVS LOG2 Transform Intensity | AVI LOG2 Transform Intensity | Log2(FC) (pCAVS/N) | Log2(FC) (AVI/N) | Log2(FC) (CAVS/AVI) | Norm-pCAVS MWU p value | Normal-AVI MWU p value | pCAVS-AVI MWU p value |
|---------------------------------------------|-------------------------------------|-------------|-----------------------------|----------------------------|--------------------------|--------------------------------|-------------------------------|-----------------------------|------------------------------|-----------------------------|---------------------------|---------------------------------|--------------------------------|------------------------------|--------------------|------------------|---------------------|------------------------|------------------------|-----------------------|
| Collagen alpha-6(VI) chain                  | sp A6NMZ7 CO6A6                     | COL6A6      | 57                          | 170                        | 56                       | 57                             | 170                           | 56                          | 7.0                          | 7.9                         | 5.5                       | 19.87                           | 19.06                          | 19.51                        | -0.81              | -0.36            | -0.45               | 0.226                  | 0.730                  | 0.510                 |
| Collagen alpha-1(I) chain                   | sp P02452 CO1A1                     | COL1A1      | 307                         | 1049                       | 266                      | 303                            | 1035                          | 264                         | 23.0                         | 29.6                        | 19.4                      | 26.36                           | 26.34                          | 25.11                        | -0.02              | -1.25            | 1.23                | 0.949                  | 0.016                  | 0.001                 |
| Collagen alpha-1(III) chain                 | sp P02461 CO3A1                     | COL3A1      | 196                         | 687                        | 167                      | 130                            | 437                           | 99                          | 21.5                         | 26.8                        | 18.3                      | 23.74                           | 23.37                          | 22.58                        | -0.37              | -1.16            | 0.79                | 0.661                  | 0.063                  | 0.180                 |
| Collagen alpha-1(IV) chain                  | sp P02462 CO4A1                     | COL4A1      | 90                          | 229                        | 73                       | 90                             | 227                           | 71                          | 13.4                         | 14.8                        | 9.5                       | 21.80                           | 21.00                          | 21.16                        | -0.80              | -0.64            | -0.16               | 0.343                  | 0.413                  | 1.000                 |
| Prelamin-A/C                                | sp P02545 LMNA                      | LMNA        | 11                          | 48                         | 20                       | 11                             | 48                            | 20                          | 6.6                          | 9.7                         | 8.7                       | 17.01                           | 17.10                          | 17.59                        | 0.09               | 0.58             | -0.49               | 1.000                  | 1.000                  | 1.165                 |
| Complement C1q subcomponent subunit A       | sp P02745 C1QA                      | C1QA        | 16                          | 51                         | 8                        | 16                             | 51                            | 8                           | 12.3                         | 13.1                        | 5.1                       | 17.17                           | 17.37                          | 18.03                        | 0.19               | 0.86             | -0.66               | 0.851                  | 1.000                  | 0.513                 |
| Fibronectin                                 | sp P02751 FN1                       | FN1         | 50                          | 334                        | 95                       | 50                             | 334                           | 95                          | 6.4                          | 14.5                        | 9.7                       | 19.77                           | 21.35                          | 21.92                        | 1.59               | 2.15             | -0.57               | 0.040                  | 0.032                  | 0.320                 |
| Vitronectin                                 | sp P04004 VTNC                      | VTNC        | 9                           | 45                         | 5                        | 2                              | 17                            | 1                           | 4.4                          | 8.3                         | 1.9                       | 0.00                            | 17.25                          | 0.00                         | 17.25              | 0.00             | 17.25               | UTC                    | UTC                    | UTC                   |
| Collagen alpha-2(V) chain                   | sp P05997 CO5A2                     | COL5A2      | 81                          | 323                        | 61                       | 81                             | 322                           | 61                          | 11.9                         | 15.9                        | 7.7                       | 22.56                           | 22.51                          | 21.59                        | -0.05              | -0.97            | 0.92                | 0.949                  | 0.032                  | 0.005                 |
| Decorin                                     | sp P07595 PGS2                      | DCN         | 112                         | 392                        | 89                       | 112                            | 390                           | 89                          | 43.0                         | 52.4                        | 41.4                      | 21.72                           | 22.17                          | 21.53                        | 0.45               | -0.19            | 0.64                | 0.226                  | 0.413                  | 0.180                 |
| Collagen alpha-2(I) chain                   | sp P08123 CO1A2                     | COL1A2      | 487                         | 1538                       | 380                      | 485                            | 1533                          | 379                         | 33.9                         | 37.7                        | 28.2                      | 26.23                           | 26.09                          | 25.28                        | -0.14              | -0.95            | 0.81                | 1.000                  | 0.016                  | 0.001                 |
| Collagen alpha-2(IV) chain                  | sp P08572 CO4A2                     | COL4A2      | 68                          | 136                        | 55                       | 68                             | 134                           | 54                          | 6.9                          | 6.1                         | 5.4                       | 20.66                           | 19.91                          | 19.96                        | -0.75              | -0.70            | -0.05               | 0.489                  | 0.556                  | 0.827                 |
| Vimentin                                    | sp P08670 VIME                      | VIM         | 300                         | 1224                       | 456                      | 294                            | 1196                          | 446                         | 72.6                         | 83.2                        | 83.9                      | 23.95                           | 24.37                          | 24.68                        | 0.42               | 0.73             | -0.31               | 0.489                  | 0.190                  | 0.827                 |
| SPARC                                       | sp P09486 SPRC                      | SPARC       | 4                           | 18                         | 2                        | 4                              | 18                            | 2                           | 5.8                          | 9.2                         | 1.7                       | 0.00                            | 16.67                          | 0.00                         | 16.67              | 0.00             | 16.67               | UTC                    | UTC                    | UTC                   |
| Collagen alpha-1(XI) chain                  | sp P12107 COB1                      | COL11A1     | 57                          | 202                        | 45                       | 18                             | 85                            | 19                          | 6.7                          | 9.2                         | 5.2                       | 20.31                           | 19.58                          | 18.84                        | -0.72              | -1.47            | 0.74                | 0.190                  | 0.667                  | 0.333                 |
| Collagen alpha-1(VI) chain                  | sp P12109 CO6A1                     | COL6A1      | 256                         | 944                        | 262                      | 254                            | 936                           | 261                         | 37.5                         | 45.1                        | 31.2                      | 24.37                           | 24.20                          | 24.20                        | -0.18              | -0.17            | 0.00                | 0.226                  | 0.286                  | 0.913                 |
| Collagen alpha-2(VI) chain                  | sp P12110 CO6A2                     | COL6A2      | 243                         | 848                        | 238                      | 241                            | 840                           | 235                         | 30.9                         | 34.6                        | 27.1                      | 23.79                           | 23.78                          | 23.43                        | -0.02              | -0.36            | 0.35                | 0.949                  | 0.190                  | 0.221                 |
| Collagen alpha-3(VI) chain                  | sp P12111 CO6A3                     | COL6A3      | 724                         | 2839                       | 842                      | 724                            | 2834                          | 842                         | 32.0                         | 38.9                        | 31.8                      | 25.23                           | 25.62                          | 25.86                        | 0.39               | 0.63             | -0.24               | 0.138                  | 0.063                  | 0.441                 |
| Collagen alpha-1(V) chain                   | sp P20908 CO5A1                     | COL5A1      | 147                         | 503                        | 118                      | 108                            | 385                           | 91                          | 12.1                         | 14.7                        | 9.5                       | 22.94                           | 23.03                          | 22.95                        | 0.09               | -0.59            | 0.68                | 0.753                  | 0.063                  | 0.027                 |
| Biglycan                                    | sp P21810 PGS1                      | BGN         | 207                         | 722                        | 235                      | 207                            | 720                           | 235                         | 44.0                         | 50.9                        | 43.5                      | 23.78                           | 23.88                          | 24.29                        | 0.10               | 0.50             | -0.41               | 1.000                  | 0.413                  | 0.583                 |
| Tenascin-X                                  | sp P22105 TNX                       | TNXB        | 114                         | 660                        | 134                      | 115                            | 660                           | 134                         | 11.5                         | 20.9                        | 11.0                      | 20.95                           | 22.75                          | 21.87                        | 1.80               | 0.93             | 0.87                | 0.056                  | 0.730                  | 0.320                 |
| Fibulin-1                                   | sp P223142 FBLN1                    | FBLN1       | 5                           | 20                         | 9                        | 5                              | 20                            | 6                           | 3.0                          | 4.2                         | 2.9                       | 16.80                           | 17.88                          | 0.00                         | 1.08               | -16.80           | 17.88               | 0.056                  | UTC                    | UTC                   |
| Tenascin                                    | sp P24821 TENA                      | TNC         | 18                          | 163                        | 43                       | 18                             | 163                           | 43                          | 2.7                          | 8.9                         | 5.0                       | 18.95                           | 19.77                          | 19.65                        | 0.81               | 0.69             | 0.12                | 0.225                  | 0.143                  | 0.827                 |
| Fibrillin-1                                 | sp P35555 FBN1                      | FBN1        | 25                          | 113                        | 32                       | 25                             | 113                           | 32                          | 2.1                          | 2.5                         | 1.5                       | 19.85                           | 20.89                          | 21.03                        | 1.03               | 1.18             | -0.14               | 0.280                  | 0.190                  | 0.827                 |
| Myosin-10                                   | sp P35580 MYH10                     | MYH10       | 15                          | 73                         | 26                       | 15                             | 73                            | 26                          | 3.6                          | 3.0                         | 3.0                       | 17.70                           | 18.27                          | 19.28                        | 0.57               | 1.57             | -1.01               | 1.000                  | 0.533                  | 0.412                 |
| Collagen alpha-1(XV) chain                  | sp P39059 COFA1                     | COL15A1     | 46                          | 139                        | 41                       | 46                             | 139                           | 41                          | 8.0                          | 8.4                         | 5.1                       | 20.28                           | 19.85                          | 19.79                        | -0.43              | -0.49            | 0.06                | 0.753                  | 0.413                  | 0.827                 |
| Collagen alpha-1(XVIII) chain               | sp P39060 CO1A1                     | COL18A1     | 35                          | 39                         | 15                       | 35                             | 39                            | 15                          | 6.9                          | 2.9                         | 2.4                       | 19.97                           | 18.37                          | 18.96                        | -1.60              | -1.01            | -0.59               | 0.374                  | 1.000                  | 0.545                 |
| Cartilage oligomeric matrix protein         | sp P49747 COMP                      | COMP        | 16                          | 69                         | 15                       | 12                             | 56                            | 14                          | 5.5                          | 9.0                         | 5.3                       | 18.48                           | 18.85                          | 18.82                        | 0.37               | 0.34             | 0.03                | 0.769                  | 1.000                  | 0.949                 |
| Serpin H1                                   | sp P50454 SERPH                     | SERPINH     | 3                           | 18                         | 12                       | 3                              | 18                            | 12                          | 3.0                          | 5.3                         | 7.9                       | 0.00                            | 0.00                           | 18.44                        | 0.00               | 18.44            | -18.44              | UTC                    | UTC                    | UTC                   |
| Lumican                                     | sp P51884 LUM                       | LUM         | 103                         | 418                        | 130                      | 60                             | 271                           | 86                          | 28.0                         | 42.0                        | 35.8                      | 22.24                           | 22.40                          | 22.40                        | 0.17               | 0.00             | 0.489               | 0.556                  | 0.827                  | 0.827                 |
| Microfibril-associated glycoprotein 4       | sp P55083 MFAP4                     | MFAP4       | 62                          | 171                        | 43                       | 62                             | 171                           | 43                          | 31.0                         | 34.3                        | 21.3                      | 20.59                           | 20.93                          | 20.05                        | 0.34               | -0.54            | 0.88                | 0.571                  | 0.486                  | 0.177                 |
| Basement membrane-specific heparan sulfate  | sp P98160 PGBM                      | HSPG2       | 159                         | 422                        | 161                      | 159                            | 422                           | 161                         | 8.7                          | 8.7                         | 7.3                       | 21.68                           | 20.90                          | 21.80                        | -0.78              | 0.12             | -0.90               | 0.280                  | 0.905                  | 0.377                 |
| Collagen alpha-1(XIV) chain                 | sp Q05707 COE1                      | COL14A1     | 52                          | 159                        | 90                       | 52                             | 159                           | 90                          | 8.7                          | 9.1                         | 11.2                      | 19.82                           | 19.09                          | 21.39                        | -0.73              | 1.57             | -2.30               | 0.280                  | 0.286                  | 0.090                 |
| Fibromodulin                                | sp Q06828 FMOD                      | FMOD        | 121                         | 443                        | 104                      | 117                            | 430                           | 103                         | 44.3                         | 50.7                        | 34.3                      | 21.64                           | 21.65                          | 21.11                        | 0.00               | -0.53            | 0.54                | 1.000                  | 0.190                  | 0.267                 |
| Collagen alpha-1(XVI) chain                 | sp Q07092 COG1                      | COL16A1     | 30                          | 123                        | 32                       | 28                             | 111                           | 29                          | 5.0                          | 8.2                         | 4.9                       | 20.28                           | 20.03                          | 19.01                        | -0.25              | -1.27            | 1.02                | 0.753                  | 0.114                  | 0.138                 |
| Dermatopontin                               | sp Q07507 DERM1                     | DPT         | 19                          | 73                         | 21                       | 19                             | 73                            | 21                          | 17.2                         | 22.0                        | 18.4                      | 18.74                           | 18.74                          | 18.31                        | 0.00               | -0.43            | 0.42                | 0.641                  | 0.133                  | 0.280                 |
| Nidogen-2                                   | sp O14112 NID2                      | NID2        | 11                          | 50                         | 17                       | 11                             | 50                            | 17                          | 2.1                          | 3.5                         | 2.4                       | 17.35                           | 17.87                          | 18.03                        | 0.52               | 0.67             | -0.15               | 0.571                  | 1.000                  | 1.000                 |
| Transforming growth factor-beta-induced prc | sp Q15582 BGH3                      | BGH3        | 47                          | 277                        | 70                       | 47                             | 277                           | 70                          | 15.7                         | 29.9                        | 19.2                      | 19.44                           | 21.28                          | 21.08                        | 1.84               | 1.64             | 0.21                | 0.018                  | 0.190                  | 0.441                 |
| Collagen alpha-1(XXI) chain                 | sp Q96P44 COL1A1                    | COL21A1     | 18                          | 55                         | 14                       | 18                             | 50                            | 14                          | 6.3                          | 7.5                         | 4.3                       | 19.00                           | 19.24                          | 18.58                        | -0.23              | -0.42            | 0.65                | 0.489                  | 0.057                  | 0.126                 |
| Collagen alpha-1(XII) chain                 | sp Q99715 COCA1                     | COL12A1     | 56                          | 197                        | 64                       | 56                             | 197                           | 64                          | 5.6                          | 7.0                         | 5.4                       | 19.61                           | 19.35                          | 19.29                        | -0.25              | -0.32            | 0.06                | 0.753                  | 0.905                  | 1.000                 |
| Asporin                                     | sp Q9BXN1 ASPN                      | ASPN        | 42                          | 115                        | 38                       | 42                             | 115                           | 38                          | 4.2                          | 22.9                        | 17.3                      | 23.02                           | 22.74                          | 23.00                        | -0.28              | -0.02            | 0.00                | 0.571                  | 1.000                  | 0.743                 |
| Dentin sialophosphoprotein                  | sp Q9NZW4 DPPP                      | DPPP        | 2                           | 11                         | 0                        | 2                              | 11                            | 0                           | 0.7                          | 1.3                         | 0.0                       | 0.00                            | 0.00                           | 0.00                         | 0.00               | 0.00             | 0.00                | UTC                    | UTC                    | UTC                   |
| EMILIN-1                                    | sp Q9Y6C2 EMIL1                     | EMILIN1     | 24                          | 109                        | 32                       | 24                             | 109                           | 32                          | 7.5                          | 10.9                        | 7.2                       | 18.64                           | 19.04                          | 19.21                        | 0.40               | 0.57             | -0.17               | 0.280                  | 0.286                  | 0.661                 |

**Supplementary Table S4:** Gene Ontology analysis results of non-collagen type proteins identified via Collagenase Type III LC-MSMS Proteomics. P-value is Fisher's exact p-value. FDR: false discovery rate

| Fold Enrichment | Function                     | GO         | Proteins                                                                                                                      | Protein Count | p-value  | FDR      | -LOG10(FDR) |
|-----------------|------------------------------|------------|-------------------------------------------------------------------------------------------------------------------------------|---------------|----------|----------|-------------|
| 88.65           | Basement Membrane            | GO:0005604 | TNC, LOXL1, HSPG2, BGH3, VTN, NID2, SPARC, FN1, FBN1, FBLN1                                                                   | 10            | 1.66E-17 | 1.11E-14 | 13.95       |
| 44.61           | Collagen-containing ECM      | GO:0062023 | TNC, LOXL1, C1QA, TNXB, ASPN, MFAP4, DPT, BGN, FMOD, HSPG2, DCN, LUM, EMILIN1, COMP, BGH3, VTN, NID2, SPARC, FN1, FBN1, FBLN1 | 21            | 4.58E-33 | 9.2E-30  | 29.04       |
| 96.53           | Collagen fibril organization | GO:0030199 | TNXB, DPT, FMOD, LUM, COMP                                                                                                    | 5             | 2.64E-09 | 5.26E-06 | 5.28        |
| 100             | Collagen binding             | GO:0005518 | ASP, DCN, LUM, COMP, BGH3, VTN, NID2, SPARC, FN1                                                                              | 10            | 1.24E-16 | 1.96E-13 | 12.71       |
| 62.06           | Collagen metabolism          | GO:0010712 | MFAP4, VIM, EMILIN-1                                                                                                          | 3             | 1.84E-05 | 0.00666  | 2.18        |

**Supplemental Table S5:** Table outlining which valves were used for each experiment in the manuscript. #: Representative valves in **Supplemental Figure S1**. NI-Not included. Movat's Pentachrome and Herovici stain inclusion were based on sections with sufficient valve structure reporting. Proteomic inclusion was based on system suitability performance. IHC-BAMBI inclusion was done to verify presence of BAMBI protein in representative valve tissue sections. FFPE: Formalin-Fixed Paraffin Embedded. For qPCR studies, see **Supplemental Table S7**.

|                    | SKU   | Age (years) | Movat's Pentachrome | Herovici | Picrosirius Red | Proteomics | IHC-BAMBI |
|--------------------|-------|-------------|---------------------|----------|-----------------|------------|-----------|
| <b>Tissue Type</b> | -     | -           | FFPE                | FFPE     | FFPE            | FFPE       | FFPE      |
| <b>Normal</b>      | DB17  | 0.05        | x                   | NI       | x               | NI         | NI        |
|                    | DB051 | 0.66        | x                   | x        | x               | x          | NI        |
|                    | NDRI  | 2           | x                   | x        |                 | x          | x         |
|                    | DB85  | 9           | x                   | x        | x               | x          | NI        |
|                    | DB27  | 17          | x                   | x        | x               | x          | x         |
| <b>pCAVS</b>       | DB106 | 0.04        | x                   | x        | x               | x          | NI        |
|                    | DB43  | 0.15        | x                   | x        | x               | x          | NI        |
|                    | DB40  | 0.75        | x                   | x        | x               | x          | NI        |
|                    | DB105 | 5           | x                   | x        | x               | x          |           |
|                    | DB119 | 5           | x                   | x        | x               | x          | x         |
|                    | DB113 | 5           | #                   | x        | x               | x          | x         |
|                    | DB18  | 6           | x                   | x        | x               | x          | NI        |
|                    | DB3   | 11          | x                   | x        | x               | x          | x         |
|                    | DB117 | 12          | x                   | x        | x               | x          | NI        |
|                    | DB41  | 14          | x                   | x        | x               | x          | x         |
|                    | DB16  | 17          | x                   | x        | x               | x          | x         |
| <b>AVI</b>         | DB114 | 0.17        | x                   | x        | x               | x          |           |
|                    | DB007 | 0.58        |                     | x        | x               | x          |           |
|                    | DB108 | 10          | x                   | x        | x               | x          |           |
|                    | DB83  | 10          | x                   | x        | x               | x          |           |
|                    | DB032 | 16          | #                   | x        | x               | x          |           |

**Supplemental Table S6.** Primary literature and reviews associated with aortic valve development & disease related to the BAMBI interactive network. Data were acquired by searching Pubmed and Pubmed Central with the gene names AND “aortic valve” or “aortic valve development” of “bicuspid”. The majority of the literature on aortic valve disease covers adult calcific aortic valve stenosis and very little has been done on pediatric end-stage aortic valve stenosis.

| Gene                                                                                              | Gene Symbol | Role in Aortic Valve                                                                                                                                                            | References                   |
|---------------------------------------------------------------------------------------------------|-------------|---------------------------------------------------------------------------------------------------------------------------------------------------------------------------------|------------------------------|
| Activin receptor-like kinase 2                                                                    | ACVR1       | Depletion in cushion mesenchyme leads to bicuspid aortic valve<br>Epithelial-mesenchymal transformation in valve development                                                    | 1,2                          |
| Bone Morphogenetic Protein Receptor Type 1A                                                       | BMPR1A      | Activation required for aortic valve calcification                                                                                                                              | 3                            |
| B-catenin                                                                                         | CTNNB1      | Endocardial cushion development<br>Pressure overload induced fibrosis                                                                                                           | 4,5                          |
| Dishevelled Segment Polarity Protein 2                                                            | DVL2        | Upregulated in adult stenotic aortic valves                                                                                                                                     | 6                            |
| Estrogen Receptor Beta                                                                            | ESR2        | Increases in patients with aortic valve stenosis<br>Sex specific disease features in adult aortic valve disease                                                                 | 7 ;Review <sup>8</sup>       |
| Histone Acetylation and Deacetylation                                                             | HDAC1       | Epigenomic alterations in aortic valve stenosis                                                                                                                                 | 9                            |
| LDL Receptor Related Protein 6                                                                    | LRP6        | Essential for outflow tract development<br>Increased receptor expression in adult calcific aortic valve<br>Promotes calcification in aortic valve                               | 10,11 ; Review <sup>12</sup> |
| Lamin A/C                                                                                         | LMNA        | Genetic mutation with congenital aortic valve malformation<br>Activation of osteogenic differentiation in aortic valve interstitial cells<br>Decreased in bicuspid aortic valve | 13-15                        |
| Nuclear Factor kappa B                                                                            | NFkB        | Valvular endocardial cushion development<br>Cell type differentiation during calcific aortic valve disease<br>Inflammatory regulation in early calcific aortic valve disease    | 16-19                        |
| SMAD Family Member 6                                                                              | SMAD6       | Epithelial-mesenchymal transformation in valve development<br>Alteration of ECM in aortic development<br>Variants in congenital aortic valve disease                            | 2,20-22                      |
| SMAD Family Member 7                                                                              | SMAD7       | Outflow tract malformations<br>Increases valvular calcification with the downregulation of miR-195 by SMAD7 targeting                                                           | 23,24                        |
| SWI/SNF Related, Matrix Associated, Actin Dependent Regulator of Chromatin, Subfamily A, Member 4 | SMARCA4     | Mutational effects in bicuspid aortic valve                                                                                                                                     | 25                           |
| Transforming Growth Factor Beta Receptor 2                                                        | TGFBR2      | Epithelial-mesenchymal transformation in valve development & disease<br>Ligand regulation of AV cushion endocardial cells<br>Mutations in bicuspid aortic valve                 | 26-28                        |

## REFERENCES

- 1 Thomas, P. S., Sridurongrit, S., Ruiz-Lozano, P. & Kaartinen, V. Deficient signaling via Alk2 (Acvr1) leads to bicuspid aortic valve development. *PLoS One* **7**, e35539 (2012).
- 2 Desgrosellier, J. S., Mundell, N. A., McDonnell, M. A., Moses, H. L. & Barnett, J. V. Activin receptor-like kinase 2 and Smad6 regulate epithelial–mesenchymal transformation during cardiac valve formation. *Developmental Biology* **280**, 201-210 (2005).
- 3 Gomez-Stallons, M. V., Wirrig-Schwendeman, E. E., Hassel, K. R., Conway, S. J. & Yutzey, K. E. Bone morphogenetic protein signaling is required for aortic valve calcification. *Arteriosclerosis, Thrombosis, and Vascular Biology* **36**, 1398-1405 (2016).
- 4 Liebner, S. *et al.*  $\beta$ -catenin is required for endothelial-mesenchymal transformation during heart cushion development in the mouse. *Journal of Cell Biology* **166**, 359-367 (2004).
- 5 Xiang, F.-L., Fang, M. & Yutzey, K. E. Loss of  $\beta$ -catenin in resident cardiac fibroblasts attenuates fibrosis induced by pressure overload in mice. *Nature Communications* **8**, 1-12 (2017).

- 6 Khan, K. *et al.* The role of Wnt/ $\beta$ -catenin pathway mediators in aortic valve stenosis. *Frontiers in Cell and Developmental Biology* **8**, 862 (2020).
- 7 Nordmeyer, J. *et al.* Upregulation of myocardial estrogen receptors in human aortic stenosis. *Circulation* **110**, 3270-3275 (2004).
- 8 Summerhill, V. I., Moschetta, D., Orekhov, A. N., Poggio, P. & Myasoedova, V. A. Sex-specific features of calcific aortic valve disease. *International Journal of Molecular Sciences* **21**, 5620 (2020).
- 9 Gošev, I. *et al.* Epigenome alterations in aortic valve stenosis and its related left ventricular hypertrophy. *Clinical Epigenetics* **9**, 1-28 (2017).
- 10 Rajamannan, N. M. The role of Lrp5/6 in cardiac valve disease: experimental hypercholesterolemia in the ApoE<sup>-/-</sup>/Lrp5<sup>-/-</sup> mice. *Journal of Cellular Biochemistry* **112**, 2987-2991 (2011).
- 11 Song, L., Li, Y., Wang, K. & Zhou, C. J. Cardiac neural crest and outflow tract defects in Lrp6 mutant mice. *Developmental Dynamics* **239**, 200-210 (2010).
- 12 Kang, S. Low-density lipoprotein receptor-related protein 6-mediated signaling pathways and associated cardiovascular diseases: diagnostic and therapeutic opportunities. *Human Genetics* **139**, 447-459 (2020).
- 13 Tao, J., Duan, J., Pi, X., Wang, H. & Li, S. A splicing LMNA mutation causing laminopathies accompanied by aortic valve malformation. *Journal of Clinical Laboratory Analysis*, e23736 (2021).
- 14 Perepelina, K., Klauzen, P., Kostareva, A. & Malashicheva, A. Tissue-specific influence of lamin A mutations on notch signaling and osteogenic phenotype of primary human mesenchymal cells. *Cells* **8**, 266 (2019).
- 15 Grewal, N. *et al.* Ascending aorta dilation in association with bicuspid aortic valve: a maturation defect of the aortic wall. *The Journal of Thoracic and Cardiovascular Surgery* **148**, 1583-1590 (2014).
- 16 DeLaughter, D. M. *et al.* Spatial transcriptional profile of the chick and mouse endocardial cushions identify novel regulators of endocardial EMT in vitro. *Journal of Molecular and Cellular Cardiology* **59**, 196-204 (2013).
- 17 Mahler, G. J., Farrar, E. J. & Butcher, J. T. Inflammatory cytokines promote mesenchymal transformation in embryonic and adult valve endothelial cells. *Arteriosclerosis, Thrombosis, and Vascular Biology* **33**, 121-130 (2013).
- 18 Gee, T. *et al.* Nfkb (nuclear factor  $\kappa$ -light-chain enhancer of activated b cells) activity regulates cell-type-specific and context-specific susceptibility to calcification in the aortic valve. *Arteriosclerosis, Thrombosis, and Vascular Biology* **40**, 638-655 (2020).
- 19 Kaden, J. J. *et al.* Receptor activator of nuclear factor  $\kappa$ B ligand and osteoprotegerin regulate aortic valve calcification. *Journal of Molecular and Cellular Cardiology* **36**, 57-66 (2004).
- 20 Sugi, Y., Kern, M. J., Markwald, R. R. & Burnside, J. L. Periostin expression is altered in aortic valves in Smad6 mutant mice. *Journal of Neonatal Biology* **1** (2012).
- 21 Sen, D. G. *et al.* The transcriptional signature of growth in human fetal aortic valve development. *The Annals of Thoracic Surgery* **106**, 1834-1840 (2018).
- 22 Park, J. E. *et al.* A novel SMAD6 variant in a patient with severely calcified bicuspid aortic valve and thoracic aortic aneurysm. *Molecular Genetics & Genomic Medicine* **7**, e620 (2019).
- 23 Chen, Q. *et al.* Smad7 is required for the development and function of the heart. *J Biol Chem* **284**, 292-300 (2009).
- 24 Du, J. *et al.* Downregulated MicroRNA-195 in the bicuspid aortic valve promotes calcification of valve interstitial cells via targeting SMAD7. *Cellular Physiology and Biochemistry* **44**, 884-896 (2017).
- 25 Preuss, C. *et al.* Family based whole exome sequencing reveals the multifaceted role of notch signaling in congenital heart disease. *PLoS Genetics* **12**, e1006335 (2016).
- 26 Sanford, L. P. *et al.* TGFbeta2 knockout mice have multiple developmental defects that are non-overlapping with other TGFbeta knockout phenotypes. *Development* **124**, 2659-2670 (1997).
- 27 Brown, C. B., Boyer, A. S., Runyan, R. B. & Barnett, J. V. Antibodies to the type II TGF $\beta$  receptor block cell activation and migration during atrioventricular cushion transformation in the heart. *Developmental Biology* **174**, 248-257 (1996).
- 28 Girdauskas, E., Schulz, S., Borger, M. A., Mierzwa, M. & Kuntze, T. Transforming growth factor-beta receptor type II mutation in a patient with bicuspid aortic valve disease and intraoperative aortic dissection. *The Annals of Thoracic Surgery* **91**, e70-e71 (2011).

**Supplemental Table S7:** Descriptive statistics of patient characteristics for aortic valve samples used for rt-qPCR studies (**Fig. 6**). Normal aortic valves are from cardiac transplant patients where normal valve function is defined via 2D echocardiogram. 2D Echocardiogram mean gradients define pre-operative valve function where a normal gradient is defined as <5 mmHg, mild stenosis as 5-25 mmHg, moderate stenosis as 25-50 mmHg, and severe stenosis as >50 mmHg. BSA: body surface area; C: Caucasian. DB43 was included in pCAVS due to stenosis, but main diagnosis was Hypertrophic Cardiomyopathy

|                       | SKU                    | Age (years)       | Pediatric Age Group | Gender           | Race/Ethnicity   | BSA (m <sup>2</sup> ) | Leaflet Morphology | Aortic Valve Function                        |
|-----------------------|------------------------|-------------------|---------------------|------------------|------------------|-----------------------|--------------------|----------------------------------------------|
| Normal                | DB85                   | 9                 | Child               | F                | C                | 0.95                  | Trileaflet         | Normal                                       |
|                       | DB27                   | 17                | Adolescent          | M                | C                | 2.2                   | Trileaflet         | Normal                                       |
|                       | <b>Normal Averages</b> | <b>7.17 ± 7.5</b> |                     | <b>75%M 25%F</b> | <b>75%C 25%L</b> | <b>1.03</b>           |                    |                                              |
| pCAVS                 | DB43                   | 0.15              | Infant              | M                | C                | 0.24                  | Trileaflet         | Moderate stenosis with AVI*                  |
|                       | DB40                   | 0.75              | Infant              | M                | C                | 0.37                  | Bicuspid           | Moderate Stenosis                            |
|                       | DB105                  | 5                 | Young Child         | M                | C                | 0.72                  | Bicuspid           | Moderate Stenosis with AVI                   |
|                       | DB119                  | 5                 | Young Child         | F                | -                | -                     | Bicuspid           | Moderate Stenosis with AVI                   |
|                       | DB113                  | 5                 | Young Child         | -                | -                | -                     | -                  | Trivial Stenosis; Severe AVI                 |
|                       | DB18                   | 6                 | Child               | F                | C                | 0.7                   | Bicuspid           | Moderate Stenosis with AVI                   |
|                       | DB117                  | 12                | Adolescent          | M                | -                | -                     | Bicuspid           | Moderate Stenosis with AVI                   |
|                       | DB41                   | 14                | Adolescent          | M                | C                | 1.6                   | Bicuspid           | Moderate Stenosis with AVI                   |
|                       | DB135                  | 17                | Adolescent          | M                | -                | -                     | -                  | Moderate Stenosis with AVI                   |
|                       | DB136                  | 17                | Adolescent          | M                | -                | -                     | Bicuspid           | Moderate Stenosis with AVI                   |
|                       | DB162                  | 17                | Adolescent          | F                | -                | -                     | Bicuspid           | Moderate Stenosis with AVI                   |
|                       | DB191                  | 17                | Adolescent          | M                | -                | -                     | Bicuspid           | Moderate Stenosis with AVI                   |
| <b>pCAVS Averages</b> | <b>6.90 ± 5.8</b>      |                   | <b>73%M 27%F</b>    | <b>100%C</b>     | <b>0.93</b>      |                       |                    |                                              |
| aCAVS                 | DB226                  | 19                | Adult               | F                | -                | -                     | Trileaflet         | Moderate Stenosis; no calcification          |
|                       | DB176                  | 25                | Adult               | F                | -                | -                     | Trileaflet         | Moderate Stenosis with AVI; calcification    |
|                       | DB174                  | 26                | Adult               | M                | -                | -                     | Bicuspid           | Moderate Stenosis; no calcification          |
|                       | DB221                  | 26                | Adult               | M                | -                | -                     | Bicuspid           | Moderate Stenosis with AVI; no calcification |
|                       | DB284                  | 36                | Adult               | F                | -                | -                     | Bicuspid           | Severe Stenosis; no calcification            |
| <b>aCAVS Averages</b> | <b>26.4 ± 6.1</b>      |                   | <b>40%M 60%F</b>    | <b>100%C</b>     | <b>-</b>         |                       |                    |                                              |
| Ross                  | DB152                  | 22                | Adult               | M                | -                | -                     |                    | Pulmonary-AV Autograft with AVI              |
